# Supplementary material for: Copepods enhance nutritional status, growth and development in Atlantic cod (Gadus morhua L.) larvae — can we identify the underlying factors?
Source: PeerJ. 2015 May 19;3:e902. doi: 10.7717/peerj.902 (PMC4451035; doi:10.7717/peerj.902)
Supplement: Supplemental Information 2 [file peerj-03-902-s002.xlsx]

## Sheet: Weight
Age dph	Treatment	DW, mg
4	Incubator	0.0114
4	Incubator	0.0175
4	Incubator	0.0211
4	Incubator	0.0212
4	Incubator	0.0217
4	Incubator	0.0241
4	Incubator	0.0241
4	Incubator	0.0245
4	Incubator	0.0251
4	Incubator	0.0253
4	Incubator	0.0307
4	Incubator	0.0311
4	Incubator	0.0317
4	Incubator	0.033
4	Incubator	0.034
4	Incubator	0.0357
4	Incubator	0.0368
4	Incubator	0.0375
4	Incubator	0.0387
4	Incubator	0.0629
4	Incubator	0.0775
4	Incubator	0.0801
4	Incubator	0.0805
11	Rotifers	0.0558
11	Rotifers	0.068
11	Rotifers	0.0688
11	Rotifers	0.0704
11	Rotifers	0.0825
11	Rotifers	0.0847
11	Rotifers	0.0869
11	Rotifers	0.0874
11	Rotifers	0.0878
11	Rotifers	0.089
11	Rotifers	0.0905
11	Rotifers	0.0952
11	Rotifers	0.0957
11	Rotifers	0.099
11	Rotifers	0.1
11	Rotifers	0.1057
11	Rotifers	0.1065
11	Rotifers	0.1068
11	Rotifers	0.1076
11	Rotifers	0.1143
11	Rotifers	0.1173
11	Rotifers	0.1337
11	Rotifers	0.1425
11	Rotifers	0.1426
11	Rotifers	0.1766
11	Zooplankton	0.061
11	Zooplankton	0.0614
11	Zooplankton	0.0672
11	Zooplankton	0.0689
11	Zooplankton	0.0722
11	Zooplankton	0.0822
11	Zooplankton	0.0828
11	Zooplankton	0.0841
11	Zooplankton	0.0852
11	Zooplankton	0.0861
11	Zooplankton	0.0907
11	Zooplankton	0.0929
11	Zooplankton	0.0944
11	Zooplankton	0.1021
11	Zooplankton	0.1077
11	Zooplankton	0.1259
11	Zooplankton	0.1385
11	Zooplankton	0.1452
11	Zooplankton	0.2315
15	Rotifers	0.0578
15	Rotifers	0.0939
15	Rotifers	0.095
15	Rotifers	0.1006
15	Rotifers	0.1016
15	Rotifers	0.1018
15	Rotifers	0.1033
15	Rotifers	0.1114
15	Rotifers	0.112
15	Rotifers	0.1123
15	Rotifers	0.1126
15	Rotifers	0.1178
15	Rotifers	0.1178
15	Rotifers	0.1219
15	Rotifers	0.1226
15	Rotifers	0.1255
15	Rotifers	0.1272
15	Rotifers	0.1272
15	Rotifers	0.1275
15	Rotifers	0.1305
15	Rotifers	0.132
15	Rotifers	0.1367
15	Rotifers	0.14
15	Rotifers	0.1417
15	Rotifers	0.1487
15	Rotifers	0.1504
15	Rotifers	0.1536
15	Rotifers	0.1539
15	Rotifers	0.1564
15	Rotifers	0.1655
15	Rotifers	0.1655
15	Rotifers	0.178
15	Rotifers	0.1893
15	Rotifers	0.2126
15	Rotifers	0.2297
15	Rotifers	0.2578
15	Rotifers	0.3215
15	Zooplankton	0.067
15	Zooplankton	0.0685
15	Zooplankton	0.0731
15	Zooplankton	0.07449
15	Zooplankton	0.078
15	Zooplankton	0.089
15	Zooplankton	0.0957
15	Zooplankton	0.0971
15	Zooplankton	0.099
15	Zooplankton	0.1017
15	Zooplankton	0.1059
15	Zooplankton	0.1207
15	Zooplankton	0.1207
15	Zooplankton	0.1257
15	Zooplankton	0.1265
15	Zooplankton	0.1267
15	Zooplankton	0.1312
15	Zooplankton	0.1333
15	Zooplankton	0.1337
15	Zooplankton	0.1424
15	Zooplankton	0.1491
15	Zooplankton	0.1516
15	Zooplankton	0.1534
15	Zooplankton	0.1599
15	Zooplankton	0.1751
15	Zooplankton	0.1769
15	Zooplankton	0.1852
15	Zooplankton	0.2059
15	Zooplankton	0.2189
22	Rotifers	0.2096
22	Rotifers	0.241
22	Rotifers	0.2437
22	Rotifers	0.2451
22	Rotifers	0.252
22	Rotifers	0.2606
22	Rotifers	0.2684
22	Rotifers	0.2746
22	Rotifers	0.2793
22	Rotifers	0.3011
22	Rotifers	0.3053
22	Rotifers	0.3089
22	Rotifers	0.3095
22	Rotifers	0.3291
22	Rotifers	0.3399
22	Rotifers	0.3594
22	Rotifers	0.3602
22	Rotifers	0.3672
22	Rotifers	0.3742
22	Rotifers	0.3774
22	Rotifers	0.3889
22	Rotifers	0.3904
22	Rotifers	0.3909
22	Rotifers	0.3965
22	Rotifers	0.3999
22	Rotifers	0.4068
22	Rotifers	0.428
22	Rotifers	0.4366
22	Rotifers	0.4859
22	Rotifers	0.4918
22	Rotifers	0.511
22	Rotifers	0.5344
22	Rotifers	0.544
22	Rotifers	0.5488
22	Rotifers	0.5776
22	Rotifers	0.5833
22	Zooplankton	0.2056
22	Zooplankton	0.2204
22	Zooplankton	0.2209
22	Zooplankton	0.2264
22	Zooplankton	0.2291
22	Zooplankton	0.2406
22	Zooplankton	0.259
22	Zooplankton	0.2944
22	Zooplankton	0.3116
22	Zooplankton	0.3175
22	Zooplankton	0.3406
22	Zooplankton	0.3413
22	Zooplankton	0.3449
22	Zooplankton	0.3665
22	Zooplankton	0.3704
22	Zooplankton	0.3762
22	Zooplankton	0.3796
22	Zooplankton	0.4065
22	Zooplankton	0.4205
22	Zooplankton	0.4231
22	Zooplankton	0.4478
22	Zooplankton	0.4529
22	Zooplankton	0.4589
22	Zooplankton	0.4753
22	Zooplankton	0.4918
22	Zooplankton	0.5068
22	Zooplankton	0.5132
22	Zooplankton	0.515
22	Zooplankton	0.5199
22	Zooplankton	0.5237
22	Zooplankton	0.5258
22	Zooplankton	0.5344
22	Zooplankton	0.5378
22	Zooplankton	0.6627
28	Zooplankton	0.3862
28	Zooplankton	0.7069
28	Zooplankton	0.7359
28	Zooplankton	0.8381
28	Zooplankton	0.8875
28	Zooplankton	0.931
28	Zooplankton	0.9731
28	Zooplankton	0.9944
28	Zooplankton	1.0071
28	Zooplankton	1.0096
28	Zooplankton	1.0394
28	Zooplankton	1.0581
28	Zooplankton	1.0968
28	Zooplankton	1.1012
28	Zooplankton	1.1132
28	Zooplankton	1.1412
28	Zooplankton	1.1902
28	Zooplankton	1.1951
28	Zooplankton	1.2059
28	Zooplankton	1.2385
28	Zooplankton	1.2645
28	Zooplankton	1.3043
28	Zooplankton	1.3622
28	Zooplankton	1.3648
28	Zooplankton	1.37
28	Zooplankton	1.3978
28	Zooplankton	1.4057
28	Zooplankton	1.4299
28	Zooplankton	1.4876
28	Zooplankton	1.5266
28	Zooplankton	1.5362
28	Zooplankton	1.6561
28	Zooplankton	1.7958
28	Zooplankton	1.9156
28	Zooplankton	2.0029
28	Zooplankton	2.0299
30	Rotifers	0.3657
30	Rotifers	0.3664
30	Rotifers	0.4874
30	Rotifers	0.5153
30	Rotifers	0.5237
30	Rotifers	0.5247
30	Rotifers	0.5482
30	Rotifers	0.5593
30	Rotifers	0.5669
30	Rotifers	0.5683
30	Rotifers	0.573
30	Rotifers	0.5803
30	Rotifers	0.6373
30	Rotifers	0.6434
30	Rotifers	0.6451
30	Rotifers	0.6699
30	Rotifers	0.679
30	Rotifers	0.6826
30	Rotifers	0.7094
30	Rotifers	0.7196
30	Rotifers	0.7198
30	Rotifers	0.7395
30	Rotifers	0.7409
30	Rotifers	0.7552
30	Rotifers	0.7644
30	Rotifers	0.7647
30	Rotifers	0.8359
30	Rotifers	0.8587
30	Rotifers	0.8604
30	Rotifers	0.8775
30	Rotifers	0.8799
30	Rotifers	0.8821
30	Rotifers	0.8852
30	Rotifers	0.8942
30	Rotifers	0.8993
30	Rotifers	0.9046
30	Rotifers	0.9315
30	Rotifers	0.9316
30	Rotifers	0.9324
30	Rotifers	0.9401
30	Rotifers	0.9731
30	Rotifers	0.9824
30	Rotifers	0.9851
30	Rotifers	0.9916
30	Rotifers	1.0012
30	Rotifers	1.0019
30	Rotifers	1.0139
30	Rotifers	1.0163
30	Rotifers	1.0184
30	Rotifers	1.0224
30	Rotifers	1.0445
30	Rotifers	1.0492
30	Rotifers	1.0567
30	Rotifers	1.0826
30	Rotifers	1.1024
30	Rotifers	1.1041
30	Rotifers	1.1157
30	Rotifers	1.142
30	Rotifers	1.181
30	Rotifers	1.2557
36	Rotifers	0.3931
36	Rotifers	0.4551
36	Rotifers	0.4643
36	Rotifers	0.5267
36	Rotifers	0.5666
36	Rotifers	0.6164
36	Rotifers	0.6265
36	Rotifers	0.6305
36	Rotifers	0.6632
36	Rotifers	0.6821
36	Rotifers	0.6971
36	Rotifers	0.7161
36	Rotifers	0.7243
36	Rotifers	0.7326
36	Rotifers	0.7372
36	Rotifers	0.7852
36	Rotifers	0.8024
36	Rotifers	0.8214
36	Rotifers	0.8268
36	Rotifers	0.8532
36	Rotifers	0.8839
36	Rotifers	0.8969
36	Rotifers	0.8979
36	Rotifers	0.9019
36	Rotifers	0.9084
36	Rotifers	0.9132
36	Rotifers	0.9163
36	Rotifers	0.919
36	Rotifers	0.9217
36	Rotifers	0.9222
36	Rotifers	0.9295
36	Rotifers	0.9348
36	Rotifers	0.9497
36	Rotifers	1.0044
36	Rotifers	1.0079
36	Rotifers	1.0223
36	Rotifers	1.052
36	Rotifers	1.0651
36	Rotifers	1.0949
36	Rotifers	1.1187
36	Rotifers	1.1269
36	Rotifers	1.1617
36	Rotifers	1.1746
36	Rotifers	1.2039
36	Rotifers	1.3355
36	Rotifers	1.3468
36	Rotifers	1.352
36	Rotifers	1.3565
36	Rotifers	1.3775
36	Rotifers	1.3791
36	Rotifers	1.4049
36	Rotifers	1.4119
36	Rotifers	1.4134
36	Rotifers	1.4161
36	Rotifers	1.4781
36	Rotifers	1.5368
36	Rotifers	1.8246
36	Rotifers	1.837
36	Rotifers	1.9886
36	Rotifers	2.3665
36	Zooplankton	1.0506
36	Zooplankton	1.2769
36	Zooplankton	1.4988
36	Zooplankton	1.574
36	Zooplankton	1.7166
36	Zooplankton	1.8261
36	Zooplankton	1.8347
36	Zooplankton	1.8579
36	Zooplankton	1.8883
36	Zooplankton	1.8959
36	Zooplankton	1.9441
36	Zooplankton	2.0351
36	Zooplankton	2.0606
36	Zooplankton	2.0996
36	Zooplankton	2.1031
36	Zooplankton	2.1797
36	Zooplankton	2.2154
36	Zooplankton	2.2312
36	Zooplankton	2.232
36	Zooplankton	2.2843
36	Zooplankton	2.3588
36	Zooplankton	2.4576
36	Zooplankton	2.4832
36	Zooplankton	2.4849
36	Zooplankton	2.5479
36	Zooplankton	2.5798
36	Zooplankton	2.6974
36	Zooplankton	2.7359
36	Zooplankton	2.7524
36	Zooplankton	2.7743
36	Zooplankton	2.7959
36	Zooplankton	2.7972
36	Zooplankton	2.8304
36	Zooplankton	2.9032
36	Zooplankton	2.9978
36	Zooplankton	3.0056
36	Zooplankton	3.0534
36	Zooplankton	3.0892
36	Zooplankton	3.1024
36	Zooplankton	3.1206
36	Zooplankton	3.3245
36	Zooplankton	3.4237
36	Zooplankton	3.4907
36	Zooplankton	3.5428
36	Zooplankton	3.5563
36	Zooplankton	3.5754
36	Zooplankton	3.5984
36	Zooplankton	3.6114
36	Zooplankton	3.6327
36	Zooplankton	3.6629
36	Zooplankton	3.6653
36	Zooplankton	3.8138
36	Zooplankton	4.0293
36	Zooplankton	4.3522
36	Zooplankton	4.3776
36	Zooplankton	4.5165
36	Zooplankton	4.5635
36	Zooplankton	4.6605
36	Zooplankton	5.0102
36	Zooplankton	5.1016
50	Rotifers	0.762222
50	Rotifers	0.76919
50	Rotifers	0.916596
50	Rotifers	0.919169
50	Rotifers	1.06936
50	Rotifers	1.3884
50	Rotifers	1.54803
50	Rotifers	1.5491
50	Rotifers	1.55124
50	Rotifers	1.86149
50	Rotifers	2.18675
50	Rotifers	2.51286
50	Rotifers	2.84627
50	Rotifers	3.15823
50	Rotifers	3.16681
50	Rotifers	3.48349
50	Rotifers	4.11128
50	Rotifers	4.46655
50	Rotifers	4.81132
50	Zooplankton	6.29652
50	Zooplankton	7.30381
50	Zooplankton	7.44146
50	Zooplankton	7.47104
50	Zooplankton	7.68888
50	Zooplankton	8.1475
50	Zooplankton	8.34872
50	Zooplankton	8.72726
50	Zooplankton	8.86298
50	Zooplankton	9.00352
50	Zooplankton	9.7279
50	Zooplankton	10.3672
50	Zooplankton	11.0828
50	Zooplankton	11.0972
50	Zooplankton	12.2646
50	Zooplankton	12.6123
50	Zooplankton	12.9301
50	Zooplankton	13.0028
50	Zooplankton	13.5376
50	Zooplankton	13.6871
50	Zooplankton	13.8541
50	Zooplankton	14.7547
50	Zooplankton	14.8842
50	Zooplankton	14.8842
50	Zooplankton	15.2284
50	Zooplankton	15.593
50	Zooplankton	16.8096
50	Zooplankton	16.8203
50	Zooplankton	16.9668
50	Zooplankton	17.2255
50	Zooplankton	18.4276
50	Zooplankton	18.7538
50	Zooplankton	21.0565
50	Zooplankton	21.1712
50	Zooplankton	21.4772
50	Zooplankton	22.4433
50	Zooplankton	22.8552
50	Zooplankton	24.8386
52	Zooplankton	6.87406
52	Zooplankton	8.22483
52	Zooplankton	8.40414
52	Zooplankton	8.72401
52	Zooplankton	8.72998
52	Zooplankton	8.89719
52	Zooplankton	9.37321
52	Zooplankton	9.56179
52	Zooplankton	9.58487
52	Zooplankton	9.59859
52	Zooplankton	9.90172
52	Zooplankton	10.0701
52	Zooplankton	10.0859
52	Zooplankton	10.0863
52	Zooplankton	10.3273
52	Zooplankton	10.473
52	Zooplankton	10.5774
52	Zooplankton	10.8171
52	Zooplankton	11.1248
52	Zooplankton	11.2623
52	Zooplankton	11.4734
52	Zooplankton	11.4913
52	Zooplankton	11.6295
52	Zooplankton	11.6326
52	Zooplankton	11.8306
52	Zooplankton	12.0818
52	Zooplankton	12.1652
52	Zooplankton	12.1709
52	Zooplankton	12.3097
52	Zooplankton	12.5166
52	Zooplankton	12.5632
52	Zooplankton	12.6324
52	Zooplankton	12.6839
52	Zooplankton	12.8046
52	Zooplankton	12.8324
52	Zooplankton	13.0264
52	Zooplankton	13.106
52	Zooplankton	13.1442
52	Zooplankton	13.1994
52	Zooplankton	13.3439
52	Zooplankton	13.3566
52	Zooplankton	13.3605
52	Zooplankton	13.54
52	Zooplankton	13.7394
52	Zooplankton	13.8656
52	Zooplankton	13.8681
52	Zooplankton	13.884
52	Zooplankton	13.9264
52	Zooplankton	14.0669
52	Zooplankton	14.2882
52	Zooplankton	14.6375
52	Zooplankton	14.7262
52	Zooplankton	14.7425
52	Zooplankton	14.8185
52	Zooplankton	15.1398
52	Zooplankton	15.256
52	Zooplankton	15.3052
52	Zooplankton	15.4253
52	Zooplankton	15.6383
52	Zooplankton	15.6544
52	Zooplankton	15.6985
52	Zooplankton	15.7994
52	Zooplankton	15.9833
52	Zooplankton	16.1655
52	Zooplankton	16.4756
52	Zooplankton	16.6231
52	Zooplankton	16.7139
52	Zooplankton	16.8852
52	Zooplankton	17.19
52	Zooplankton	17.2379
52	Zooplankton	17.2584
52	Zooplankton	17.939
52	Zooplankton	17.9437
52	Zooplankton	18.0478
52	Zooplankton	18.4744
52	Zooplankton	18.5155
52	Zooplankton	18.6237
52	Zooplankton	18.6785
52	Zooplankton	18.9005
52	Zooplankton	19.1851
52	Zooplankton	19.4046
52	Zooplankton	19.5842
52	Zooplankton	19.6113
52	Zooplankton	19.6545
52	Zooplankton	19.7739
52	Zooplankton	19.8296
52	Zooplankton	19.8917
52	Zooplankton	20.1914
52	Zooplankton	20.2128
52	Zooplankton	20.7396
52	Zooplankton	20.8895
52	Zooplankton	21.0098
52	Zooplankton	21.0836
52	Zooplankton	21.1106
52	Zooplankton	21.728
52	Zooplankton	21.8708
52	Zooplankton	22.2805
52	Zooplankton	22.393
52	Zooplankton	23.0645
52	Zooplankton	23.2157
52	Zooplankton	24.0269
52	Zooplankton	24.0754
52	Zooplankton	24.0917
52	Zooplankton	24.1125
52	Zooplankton	24.3162
52	Zooplankton	24.3687
52	Zooplankton	24.6635
52	Zooplankton	24.9086
52	Zooplankton	24.9157
52	Zooplankton	24.9415
52	Zooplankton	25.1095
52	Zooplankton	25.7283
52	Zooplankton	25.9949
52	Zooplankton	26.1194
52	Zooplankton	26.8122
52	Zooplankton	27.0733
52	Zooplankton	27.1152
52	Zooplankton	27.3567
52	Zooplankton	27.4078
52	Zooplankton	27.844
52	Zooplankton	27.9303
52	Zooplankton	27.9674
52	Zooplankton	28.3305
52	Zooplankton	28.5551
52	Zooplankton	28.9776
52	Zooplankton	29.0351
52	Zooplankton	29.555
52	Zooplankton	30.2755
52	Zooplankton	30.7378
52	Zooplankton	31.6901
52	Zooplankton	33.3716
52	Zooplankton	33.544
52	Zooplankton	34.2821
52	Zooplankton	34.7847
52	Zooplankton	35.0684
52	Zooplankton	35.1747
52	Zooplankton	35.9117
52	Zooplankton	37.5211
52	Zooplankton	37.6399
52	Zooplankton	43.6488
52	Zooplankton	43.9481
52	Zooplankton	44.0455
52	Zooplankton	44.5906
52	Zooplankton	44.6428
52	Zooplankton	44.7621
52	Zooplankton	49.6681
52	Zooplankton	51.0458
53	Rotifers	1.8724
53	Rotifers	1.985
53	Rotifers	2.1892
53	Rotifers	2.2627
53	Rotifers	2.3095
53	Rotifers	2.3535
53	Rotifers	2.382
53	Rotifers	2.4216
53	Rotifers	2.5014
53	Rotifers	2.516
53	Rotifers	2.5466
53	Rotifers	2.5561
53	Rotifers	2.5676
53	Rotifers	2.6375
53	Rotifers	2.6653
53	Rotifers	2.7355
53	Rotifers	2.7663
53	Rotifers	2.8435
53	Rotifers	2.9553
53	Rotifers	3.2365
53	Rotifers	3.2578
53	Rotifers	3.2678
53	Rotifers	3.5196
53	Rotifers	3.5624
53	Rotifers	3.6448
53	Rotifers	3.899
53	Rotifers	4.0021
53	Rotifers	4.2662
53	Rotifers	4.2939
53	Rotifers	4.3696
53	Rotifers	4.4028
53	Rotifers	4.432
53	Rotifers	4.4974
53	Rotifers	4.5383
53	Rotifers	4.6986
53	Rotifers	5.1333
53	Rotifers	5.2342
53	Rotifers	5.2842
53	Rotifers	5.6726
53	Rotifers	5.8506
53	Rotifers	5.8913
53	Rotifers	6.0197
53	Rotifers	6.025
53	Rotifers	6.0822
53	Rotifers	6.0984
53	Rotifers	6.0998
53	Rotifers	6.5352
53	Rotifers	7.2557
53	Rotifers	7.434
53	Rotifers	7.668
53	Rotifers	7.7226
53	Rotifers	7.8765
53	Rotifers	7.9853
53	Rotifers	8.0804
53	Rotifers	8.4301
53	Rotifers	8.4824
53	Rotifers	10.2015
53	Rotifers	13.0482
53	Rotifers	14.724
63	Rotifers	5.15869
63	Rotifers	6.31983
63	Rotifers	6.80355
63	Rotifers	6.84117
63	Rotifers	6.93506
63	Rotifers	8.13212
63	Rotifers	8.19143
63	Rotifers	8.28356
63	Rotifers	8.64799
63	Rotifers	8.88941
63	Rotifers	8.9985
63	Rotifers	9.21217
63	Rotifers	9.68145
63	Rotifers	9.85608
63	Rotifers	10.1165
63	Rotifers	11.8178
63	Rotifers	12.1538
63	Rotifers	12.1721
63	Rotifers	13.0014
63	Rotifers	13.802
63	Rotifers	14.0273
63	Rotifers	15.6938
63	Rotifers	16.1897
63	Rotifers	17.0287
63	Rotifers	17.0993
63	Rotifers	17.3139
63	Rotifers	20.7161
63	Rotifers	20.7562
63	Rotifers	20.9249
70	Rotifers	11.96
70	Rotifers	14.0396
70	Rotifers	14.1739
70	Rotifers	14.5291
70	Rotifers	15.0913
70	Rotifers	15.2083
70	Rotifers	15.4736
70	Rotifers	15.6653
70	Rotifers	16.1294
70	Rotifers	16.4804
70	Rotifers	16.8003
70	Rotifers	16.8525
70	Rotifers	16.8768
70	Rotifers	16.9061
70	Rotifers	17.3936
70	Rotifers	17.5056
70	Rotifers	17.9411
70	Rotifers	18.0888
70	Rotifers	18.6711
70	Rotifers	18.7989
70	Rotifers	19.066
70	Rotifers	19.2408
70	Rotifers	19.4837
70	Rotifers	19.5408
70	Rotifers	20.3783
70	Rotifers	20.5871
70	Rotifers	20.7082
70	Rotifers	21.1112
70	Rotifers	21.117
70	Rotifers	21.1234
70	Rotifers	21.4505
70	Rotifers	21.4679
70	Rotifers	21.5162
70	Rotifers	21.6371
70	Rotifers	21.6866
70	Rotifers	21.8681
70	Rotifers	21.883
70	Rotifers	21.9572
70	Rotifers	22.0957
70	Rotifers	22.1631
70	Rotifers	22.1765
70	Rotifers	22.789
70	Rotifers	22.8555
70	Rotifers	23.1398
70	Rotifers	23.7129
70	Rotifers	24.2209
70	Rotifers	24.3853
70	Rotifers	24.529
70	Rotifers	24.8123
70	Rotifers	25.2983
70	Rotifers	25.5565
70	Rotifers	25.6726
70	Rotifers	25.8113
70	Rotifers	26.474
70	Rotifers	26.6606
70	Rotifers	26.9104
70	Rotifers	27.1213
70	Rotifers	27.4094
70	Rotifers	27.4758
70	Rotifers	28.2406
70	Rotifers	28.741
70	Rotifers	29.3914
70	Rotifers	29.691
70	Rotifers	29.7847
70	Rotifers	29.872
70	Rotifers	29.9441
70	Rotifers	30.2822
70	Rotifers	30.3968
70	Rotifers	30.4094
70	Rotifers	30.5393
70	Rotifers	30.7394
70	Rotifers	31.1166
70	Rotifers	31.1483
70	Rotifers	31.6346
70	Rotifers	31.7739
70	Rotifers	31.8389
70	Rotifers	32.1823
70	Rotifers	32.8903
70	Rotifers	32.9899
70	Rotifers	33.305
70	Rotifers	33.5702
70	Rotifers	34.0883
70	Rotifers	34.3823
70	Rotifers	34.6312
70	Rotifers	35.5942
70	Rotifers	35.717
70	Rotifers	36.9936
70	Rotifers	37.7998
70	Rotifers	38.1302
70	Rotifers	38.4211
70	Rotifers	38.8752
70	Rotifers	39.725
70	Rotifers	39.9264
70	Rotifers	40.0192
70	Rotifers	41.1194
70	Rotifers	41.8615
70	Rotifers	42.1214
70	Rotifers	42.4446
70	Rotifers	42.5705
70	Rotifers	42.7044
70	Rotifers	43.8669
70	Rotifers	44.1095
70	Rotifers	44.3877
70	Rotifers	45.5928
70	Rotifers	47.8646
70	Rotifers	49.6701
70	Rotifers	50.6843
70	Rotifers	58.4895
70	Rotifers	60.7119
70	Rotifers	63.2581
70	Rotifers	66.5938
70	Rotifers	66.9595
70	Rotifers	66.978
70	Zooplankton	62.9297
70	Zooplankton	80.1799
70	Zooplankton	95.3739
70	Zooplankton	99.2334
70	Zooplankton	103.522
70	Zooplankton	115.529
70	Zooplankton	117.553
70	Zooplankton	120.247
70	Zooplankton	154.861
70	Zooplankton	156.115
70	Zooplankton	198.66
73	Zooplankton	58.9584
73	Zooplankton	71.1474
73	Zooplankton	74.4266
73	Zooplankton	75.0122
73	Zooplankton	78.2543
73	Zooplankton	78.3651
73	Zooplankton	78.9428
73	Zooplankton	81.1197
73	Zooplankton	82.453
73	Zooplankton	86.2758
73	Zooplankton	95.83
73	Zooplankton	96.905
73	Zooplankton	97.1742
73	Zooplankton	102.115
73	Zooplankton	104.378
73	Zooplankton	105.261
73	Zooplankton	105.415
73	Zooplankton	105.431
73	Zooplankton	106.423
73	Zooplankton	111.608
73	Zooplankton	113.081
73	Zooplankton	115.761
73	Zooplankton	116.171
73	Zooplankton	116.85
73	Zooplankton	119.191
73	Zooplankton	123.154
73	Zooplankton	128.353
73	Zooplankton	128.947
73	Zooplankton	130.401
73	Zooplankton	130.761
73	Zooplankton	131.75
73	Zooplankton	132.676
73	Zooplankton	132.719
73	Zooplankton	136.727
73	Zooplankton	138.683
73	Zooplankton	138.748
73	Zooplankton	140.007
73	Zooplankton	140.289
73	Zooplankton	140.621
73	Zooplankton	142.349
73	Zooplankton	143.116
73	Zooplankton	143.268
73	Zooplankton	144.136
73	Zooplankton	145.3
73	Zooplankton	147.233
73	Zooplankton	147.742
73	Zooplankton	148.091
73	Zooplankton	148.345
73	Zooplankton	148.442
73	Zooplankton	149.338
73	Zooplankton	149.585
73	Zooplankton	150.2
73	Zooplankton	150.298
73	Zooplankton	150.409
73	Zooplankton	150.492
73	Zooplankton	151.215
73	Zooplankton	151.477
73	Zooplankton	151.521
73	Zooplankton	151.798
73	Zooplankton	152.665
73	Zooplankton	152.79
73	Zooplankton	155.193
73	Zooplankton	155.522
73	Zooplankton	155.601
73	Zooplankton	158.559
73	Zooplankton	158.62
73	Zooplankton	159.56
73	Zooplankton	162.364
73	Zooplankton	163.897
73	Zooplankton	163.918
73	Zooplankton	164.622
73	Zooplankton	164.665
73	Zooplankton	164.877
73	Zooplankton	165.979
73	Zooplankton	167.823
73	Zooplankton	168.099
73	Zooplankton	168.108
73	Zooplankton	169.486
73	Zooplankton	170.361
73	Zooplankton	171.28
73	Zooplankton	171.565
73	Zooplankton	172.227
73	Zooplankton	174.03
73	Zooplankton	174.814
73	Zooplankton	175.287
73	Zooplankton	176.375
73	Zooplankton	177.353
73	Zooplankton	177.649
73	Zooplankton	178.155
73	Zooplankton	179.224
73	Zooplankton	180.088
73	Zooplankton	180.29
73	Zooplankton	180.557
73	Zooplankton	181.064
73	Zooplankton	181.916
73	Zooplankton	182.165
73	Zooplankton	182.307
73	Zooplankton	183.441
73	Zooplankton	184.59
73	Zooplankton	186.959
73	Zooplankton	190.592
73	Zooplankton	190.974
73	Zooplankton	191.061
73	Zooplankton	192.375
73	Zooplankton	192.982
73	Zooplankton	193.491
73	Zooplankton	194.29
73	Zooplankton	194.574
73	Zooplankton	195.575
73	Zooplankton	196.741
73	Zooplankton	196.758
73	Zooplankton	197.19
73	Zooplankton	200.549
73	Zooplankton	201.145
73	Zooplankton	201.428
73	Zooplankton	201.671
73	Zooplankton	202.103
73	Zooplankton	203.21
73	Zooplankton	203.215
73	Zooplankton	203.215
73	Zooplankton	203.784
73	Zooplankton	207.414
73	Zooplankton	209.173
73	Zooplankton	209.268
73	Zooplankton	209.33
73	Zooplankton	211.17
73	Zooplankton	213.726
73	Zooplankton	214.152
73	Zooplankton	215.179
73	Zooplankton	218.717
73	Zooplankton	219.635
73	Zooplankton	221.439
73	Zooplankton	226.175
73	Zooplankton	227.941
73	Zooplankton	228.863
73	Zooplankton	228.994
73	Zooplankton	229.332
73	Zooplankton	229.457
73	Zooplankton	230.306
73	Zooplankton	231.298
73	Zooplankton	231.645
73	Zooplankton	233.016
73	Zooplankton	243.596
73	Zooplankton	245.101
73	Zooplankton	245.198
73	Zooplankton	247.875
73	Zooplankton	249.358
73	Zooplankton	256.138
73	Zooplankton	258.662
73	Zooplankton	259.258
73	Zooplankton	259.527
73	Zooplankton	259.568
73	Zooplankton	263.819
73	Zooplankton	263.923
73	Zooplankton	266.059
73	Zooplankton	267.244
73	Zooplankton	267.731
73	Zooplankton	268.269
73	Zooplankton	272.158
73	Zooplankton	275.313
73	Zooplankton	275.859
73	Zooplankton	280.315
73	Zooplankton	282.518
73	Zooplankton	290.688
73	Zooplankton	307.546
73	Zooplankton	310.342
73	Zooplankton	313.171
73	Zooplankton	319.742
73	Zooplankton	328.091
73	Zooplankton	393.881
73	Zooplankton	421.059
84	Rotifers	51.9107
84	Rotifers	54.3079
84	Rotifers	56.3763
84	Rotifers	61.0172
84	Rotifers	66.0876
84	Rotifers	66.31
84	Rotifers	68.3251
84	Rotifers	69.6697
84	Rotifers	70.0982
84	Rotifers	72.4273
84	Rotifers	72.9503
84	Rotifers	74.8826
84	Rotifers	77.6381
84	Rotifers	77.7303
84	Rotifers	78.1388
84	Rotifers	79.5205
84	Rotifers	81.785
84	Rotifers	82.9083
84	Rotifers	86.471
84	Rotifers	86.6069
84	Rotifers	90.4772
84	Rotifers	92.1139
84	Rotifers	92.6281
84	Rotifers	94.9376
84	Rotifers	97.5385
84	Rotifers	98.3707
84	Rotifers	98.7817
84	Rotifers	99.7098
84	Rotifers	100.085
84	Rotifers	100.418
84	Rotifers	101.1
84	Rotifers	104.186
84	Rotifers	106.334
84	Rotifers	106.575
84	Rotifers	106.832
84	Rotifers	108.59
84	Rotifers	109.329
84	Rotifers	110.182
84	Rotifers	111.13
84	Rotifers	111.659
84	Rotifers	114.314
84	Rotifers	114.664
84	Rotifers	114.751
84	Rotifers	115.45
84	Rotifers	117.119
84	Rotifers	121.063
84	Rotifers	121.29
84	Rotifers	121.466
84	Rotifers	123.876
84	Rotifers	125.678
84	Rotifers	126.467
84	Rotifers	128.07
84	Rotifers	128.661
84	Rotifers	129.452
84	Rotifers	129.942
84	Rotifers	130.139
84	Rotifers	133.281
84	Rotifers	133.294
84	Rotifers	133.951
84	Rotifers	134.222
84	Rotifers	134.484
84	Rotifers	135.374
84	Rotifers	138.176
84	Rotifers	138.237
84	Rotifers	138.508
84	Rotifers	139.82
84	Rotifers	141.558
84	Rotifers	142.411
84	Rotifers	143.195
84	Rotifers	143.904
84	Rotifers	146.157
84	Rotifers	150.373
84	Rotifers	152.842
84	Rotifers	155.282
84	Rotifers	160.131
84	Rotifers	160.245
84	Rotifers	162.278
84	Rotifers	162.351
84	Rotifers	165.006
84	Rotifers	166.45
84	Rotifers	168.125
84	Rotifers	169.794
84	Rotifers	170.763
84	Rotifers	173.587
84	Rotifers	174.407
84	Rotifers	176.179
84	Rotifers	176.383
84	Rotifers	178.317
84	Rotifers	179.23
84	Rotifers	181.606
84	Rotifers	184.535
84	Rotifers	189.433
84	Rotifers	189.714
84	Rotifers	192.209
84	Rotifers	192.283
84	Rotifers	192.514
84	Rotifers	192.815
84	Rotifers	195.651
84	Rotifers	196.45
84	Rotifers	197.379
84	Rotifers	200.166
84	Rotifers	203.375
84	Rotifers	203.793
84	Rotifers	207.616
84	Rotifers	211.295
84	Rotifers	211.841
84	Rotifers	212.125
84	Rotifers	214.994
84	Rotifers	217.196
84	Rotifers	220.425
84	Rotifers	222.781
84	Rotifers	223.259
84	Rotifers	235.213
84	Rotifers	236.939
84	Rotifers	238.989
84	Rotifers	240.298
84	Rotifers	253.132
84	Rotifers	259.175
84	Rotifers	273.561
84	Rotifers	276.282
84	Rotifers	282.605
84	Rotifers	289.779

## Sheet: Length
Age dph	Treatment	Larve SL mm
4	Both	4.03509
4	Both	4.18246
4	Both	4.21404
4	Both	4.30175
4	Both	4.32281
4	Both	4.32632
4	Both	4.38246
4	Both	4.41404
4	Both	4.42456
4	Both	4.44912
4	Both	4.45263
4	Both	4.45965
4	Both	4.47368
4	Both	4.48772
4	Both	4.53333
4	Both	4.54737
4	Both	4.5614
4	Both	4.56491
4	Both	4.58246
4	Both	4.60351
4	Both	4.6386
4	Both	4.67368
4	Both	4.67368
4	Both	4.84912
8	Rotifers	4.18947
8	Rotifers	4.20702
8	Rotifers	4.20702
8	Rotifers	4.24561
8	Rotifers	4.26667
8	Rotifers	4.29825
8	Rotifers	4.46316
8	Rotifers	4.48421
8	Rotifers	4.54386
8	Rotifers	4.67368
8	Rotifers	4.69123
8	Rotifers	4.70526
8	Rotifers	4.71228
8	Rotifers	4.77895
8	Rotifers	4.79649
8	Rotifers	4.89474
8	Rotifers	4.90526
8	Rotifers	4.93684
8	Rotifers	5.00351
8	Rotifers	5.02456
8	Rotifers	5.04912
8	Rotifers	5.07368
8	Rotifers	5.08421
8	Rotifers	5.12281
8	Rotifers	5.12281
8	Rotifers	5.14737
8	Rotifers	5.25614
8	Rotifers	5.34035
8	Rotifers	5.40702
8	Zooplankton	3.94737
8	Zooplankton	4.05614
8	Zooplankton	4.0807
8	Zooplankton	4.38596
8	Zooplankton	4.51579
8	Zooplankton	4.51579
8	Zooplankton	4.52632
8	Zooplankton	4.5614
8	Zooplankton	4.6
8	Zooplankton	4.67018
8	Zooplankton	4.67719
8	Zooplankton	4.69123
8	Zooplankton	4.72281
8	Zooplankton	4.73684
8	Zooplankton	4.75789
8	Zooplankton	4.81754
8	Zooplankton	4.84561
8	Zooplankton	4.88772
8	Zooplankton	4.89123
8	Zooplankton	4.93684
8	Zooplankton	4.94035
8	Zooplankton	5.04912
8	Zooplankton	5.09825
8	Zooplankton	5.10175
8	Zooplankton	5.11579
8	Zooplankton	5.14737
8	Zooplankton	5.22456
8	Zooplankton	5.22456
8	Zooplankton	5.27368
11	Rotifers	4.10877
11	Rotifers	4.42456
11	Rotifers	4.55439
11	Rotifers	4.61053
11	Rotifers	4.79298
11	Rotifers	4.81053
11	Rotifers	4.82807
11	Rotifers	4.83158
11	Rotifers	4.90526
11	Rotifers	4.97193
11	Rotifers	5.00351
11	Rotifers	5.03158
11	Rotifers	5.04211
11	Rotifers	5.04211
11	Rotifers	5.07018
11	Rotifers	5.07018
11	Rotifers	5.07719
11	Rotifers	5.09123
11	Rotifers	5.09474
11	Rotifers	5.10526
11	Rotifers	5.1193
11	Rotifers	5.14386
11	Rotifers	5.15789
11	Rotifers	5.16491
11	Rotifers	5.19649
11	Rotifers	5.20351
11	Rotifers	5.22456
11	Rotifers	5.2386
11	Rotifers	5.24561
11	Rotifers	5.26316
11	Rotifers	5.27018
11	Rotifers	5.2807
11	Rotifers	5.30175
11	Rotifers	5.3193
11	Rotifers	5.32982
11	Rotifers	5.3614
11	Rotifers	5.36842
11	Rotifers	5.37544
11	Rotifers	5.39649
11	Rotifers	5.40702
11	Rotifers	5.41404
11	Rotifers	5.4386
11	Rotifers	5.4807
11	Rotifers	5.50175
11	Rotifers	5.53333
11	Rotifers	5.55789
11	Rotifers	5.5614
11	Rotifers	5.60702
11	Rotifers	5.60702
11	Rotifers	5.61404
11	Rotifers	5.62105
11	Rotifers	5.62807
11	Rotifers	5.63509
11	Rotifers	5.64561
11	Rotifers	5.65263
11	Rotifers	5.65263
11	Rotifers	5.7614
11	Rotifers	5.83158
11	Rotifers	5.93333
11	Zooplankton	4.54737
11	Zooplankton	4.55088
11	Zooplankton	4.55439
11	Zooplankton	4.55789
11	Zooplankton	4.56842
11	Zooplankton	4.57895
11	Zooplankton	4.58246
11	Zooplankton	4.68772
11	Zooplankton	4.70877
11	Zooplankton	4.73684
11	Zooplankton	4.81053
11	Zooplankton	4.81404
11	Zooplankton	4.8386
11	Zooplankton	4.86667
11	Zooplankton	4.87018
11	Zooplankton	4.87018
11	Zooplankton	4.87719
11	Zooplankton	4.8807
11	Zooplankton	4.90526
11	Zooplankton	4.93684
11	Zooplankton	4.95789
11	Zooplankton	4.95789
11	Zooplankton	4.99649
11	Zooplankton	5.01404
11	Zooplankton	5.02105
11	Zooplankton	5.02105
11	Zooplankton	5.05263
11	Zooplankton	5.07018
11	Zooplankton	5.13684
11	Zooplankton	5.13684
11	Zooplankton	5.14386
11	Zooplankton	5.1614
11	Zooplankton	5.16491
11	Zooplankton	5.17895
11	Zooplankton	5.18596
11	Zooplankton	5.19649
11	Zooplankton	5.22456
11	Zooplankton	5.23158
11	Zooplankton	5.25614
11	Zooplankton	5.25614
11	Zooplankton	5.25614
11	Zooplankton	5.26316
11	Zooplankton	5.26667
11	Zooplankton	5.2807
11	Zooplankton	5.30526
11	Zooplankton	5.30526
11	Zooplankton	5.36491
11	Zooplankton	5.38246
11	Zooplankton	5.38947
11	Zooplankton	5.44561
11	Zooplankton	5.47018
11	Zooplankton	5.47719
11	Zooplankton	5.50877
11	Zooplankton	5.51579
11	Zooplankton	5.54035
11	Zooplankton	5.54386
11	Zooplankton	5.57193
11	Zooplankton	5.6807
11	Zooplankton	5.68772
15	Rotifers	5.08696
15	Rotifers	5.13158
15	Rotifers	5.17368
15	Rotifers	5.18421
15	Rotifers	5.2087
15	Rotifers	5.23684
15	Rotifers	5.26316
15	Rotifers	5.29474
15	Rotifers	5.39474
15	Rotifers	5.39474
15	Rotifers	5.41579
15	Rotifers	5.43158
15	Rotifers	5.45263
15	Rotifers	5.45263
15	Rotifers	5.48696
15	Rotifers	5.49474
15	Rotifers	5.49565
15	Rotifers	5.51579
15	Rotifers	5.52632
15	Rotifers	5.55263
15	Rotifers	5.56316
15	Rotifers	5.57368
15	Rotifers	5.62105
15	Rotifers	5.65789
15	Rotifers	5.67368
15	Rotifers	5.68696
15	Rotifers	5.73158
15	Rotifers	5.76842
15	Rotifers	5.77895
15	Rotifers	5.78421
15	Rotifers	5.8
15	Rotifers	5.80526
15	Rotifers	5.83684
15	Rotifers	5.84348
15	Rotifers	5.88947
15	Rotifers	5.93684
15	Rotifers	5.97391
15	Rotifers	5.97895
15	Rotifers	5.98421
15	Rotifers	5.99474
15	Rotifers	6.04211
15	Rotifers	6.05263
15	Rotifers	6.06087
15	Rotifers	6.06842
15	Rotifers	6.07368
15	Rotifers	6.08421
15	Rotifers	6.11579
15	Rotifers	6.16316
15	Rotifers	6.16316
15	Rotifers	6.17895
15	Rotifers	6.2
15	Rotifers	6.2
15	Rotifers	6.21053
15	Rotifers	6.26316
15	Rotifers	6.29474
15	Rotifers	6.29565
15	Rotifers	6.34783
15	Rotifers	6.36842
15	Rotifers	6.44737
15	Rotifers	6.72632
15	Zooplankton	4.33913
15	Zooplankton	4.60526
15	Zooplankton	4.66957
15	Zooplankton	4.81739
15	Zooplankton	4.84737
15	Zooplankton	4.88421
15	Zooplankton	4.88696
15	Zooplankton	4.94783
15	Zooplankton	4.98261
15	Zooplankton	5.06316
15	Zooplankton	5.09474
15	Zooplankton	5.1
15	Zooplankton	5.12105
15	Zooplankton	5.12174
15	Zooplankton	5.14211
15	Zooplankton	5.15652
15	Zooplankton	5.1913
15	Zooplankton	5.1913
15	Zooplankton	5.2
15	Zooplankton	5.25263
15	Zooplankton	5.37895
15	Zooplankton	5.38421
15	Zooplankton	5.42105
15	Zooplankton	5.42632
15	Zooplankton	5.44211
15	Zooplankton	5.45263
15	Zooplankton	5.46316
15	Zooplankton	5.46842
15	Zooplankton	5.51053
15	Zooplankton	5.53684
15	Zooplankton	5.54211
15	Zooplankton	5.6
15	Zooplankton	5.6
15	Zooplankton	5.64211
15	Zooplankton	5.65789
15	Zooplankton	5.65789
15	Zooplankton	5.68421
15	Zooplankton	5.68421
15	Zooplankton	5.68947
15	Zooplankton	5.71579
15	Zooplankton	5.71579
15	Zooplankton	5.72632
15	Zooplankton	5.74211
15	Zooplankton	5.74783
15	Zooplankton	5.75263
15	Zooplankton	5.76842
15	Zooplankton	5.76842
15	Zooplankton	5.77368
15	Zooplankton	5.77368
15	Zooplankton	5.78947
15	Zooplankton	5.91304
15	Zooplankton	5.92632
15	Zooplankton	5.98947
15	Zooplankton	6.01579
15	Zooplankton	6.05789
15	Zooplankton	6.06842
15	Zooplankton	6.16316
15	Zooplankton	6.2
15	Zooplankton	6.31304
22	Rotifers	4.54783
22	Rotifers	5.87826
22	Rotifers	6.01739
22	Rotifers	6.03478
22	Rotifers	6.07826
22	Rotifers	6.11304
22	Rotifers	6.13043
22	Rotifers	6.16522
22	Rotifers	6.21739
22	Rotifers	6.23478
22	Rotifers	6.33913
22	Rotifers	6.33913
22	Rotifers	6.36522
22	Rotifers	6.3913
22	Rotifers	6.4
22	Rotifers	6.4087
22	Rotifers	6.47826
22	Rotifers	6.52174
22	Rotifers	6.55652
22	Rotifers	6.61739
22	Rotifers	6.64348
22	Rotifers	6.69565
22	Rotifers	6.78261
22	Rotifers	6.8087
22	Rotifers	6.86087
22	Rotifers	6.86957
22	Rotifers	6.87826
22	Rotifers	6.89565
22	Rotifers	6.90435
22	Rotifers	6.91304
22	Rotifers	6.92174
22	Rotifers	6.93043
22	Rotifers	6.94783
22	Rotifers	7.04348
22	Rotifers	7.06087
22	Rotifers	7.06957
22	Rotifers	7.06957
22	Rotifers	7.07826
22	Rotifers	7.07826
22	Rotifers	7.10435
22	Rotifers	7.11304
22	Rotifers	7.11304
22	Rotifers	7.13913
22	Rotifers	7.15652
22	Rotifers	7.18261
22	Rotifers	7.18261
22	Rotifers	7.27826
22	Rotifers	7.27826
22	Rotifers	7.30435
22	Rotifers	7.34783
22	Rotifers	7.34783
22	Rotifers	7.3913
22	Rotifers	7.43478
22	Rotifers	7.63478
22	Rotifers	7.66087
22	Rotifers	7.83478
22	Rotifers	8
22	Rotifers	8.09565
22	Rotifers	8.28696
22	Rotifers	8.46957
22	Zooplankton	5.67826
22	Zooplankton	5.78261
22	Zooplankton	5.86087
22	Zooplankton	5.86087
22	Zooplankton	6.06087
22	Zooplankton	6.09565
22	Zooplankton	6.09565
22	Zooplankton	6.16522
22	Zooplankton	6.26957
22	Zooplankton	6.27826
22	Zooplankton	6.32174
22	Zooplankton	6.32174
22	Zooplankton	6.32174
22	Zooplankton	6.4
22	Zooplankton	6.45217
22	Zooplankton	6.47826
22	Zooplankton	6.47826
22	Zooplankton	6.53043
22	Zooplankton	6.53043
22	Zooplankton	6.54783
22	Zooplankton	6.55652
22	Zooplankton	6.5913
22	Zooplankton	6.6087
22	Zooplankton	6.6087
22	Zooplankton	6.64348
22	Zooplankton	6.70435
22	Zooplankton	6.73913
22	Zooplankton	6.7913
22	Zooplankton	6.81739
22	Zooplankton	7
22	Zooplankton	7.05217
22	Zooplankton	7.14783
22	Zooplankton	7.15652
22	Zooplankton	7.15652
22	Zooplankton	7.16522
22	Zooplankton	7.2
22	Zooplankton	7.21739
22	Zooplankton	7.22609
22	Zooplankton	7.26957
22	Zooplankton	7.27826
22	Zooplankton	7.30435
22	Zooplankton	7.44348
22	Zooplankton	7.45217
22	Zooplankton	7.45217
22	Zooplankton	7.47826
22	Zooplankton	7.48696
22	Zooplankton	7.48696
22	Zooplankton	7.56522
22	Zooplankton	7.6087
22	Zooplankton	7.6087
22	Zooplankton	7.6087
22	Zooplankton	7.64348
22	Zooplankton	7.74783
22	Zooplankton	7.7913
22	Zooplankton	7.89565
22	Zooplankton	7.95652
22	Zooplankton	8.11304
22	Zooplankton	8.26087
22	Zooplankton	8.44348
22	Zooplankton	8.49565
28	Zooplankton	7.30435
28	Zooplankton	8.43478
28	Zooplankton	8.64348
28	Zooplankton	8.71304
28	Zooplankton	8.78261
28	Zooplankton	8.85217
28	Zooplankton	8.85217
28	Zooplankton	9.38261
28	Zooplankton	9.3913
28	Zooplankton	9.4
28	Zooplankton	9.42609
28	Zooplankton	9.42609
28	Zooplankton	9.46957
28	Zooplankton	9.48696
28	Zooplankton	9.6087
28	Zooplankton	9.61739
28	Zooplankton	9.69565
28	Zooplankton	9.75652
28	Zooplankton	9.77391
28	Zooplankton	9.83478
28	Zooplankton	9.86957
28	Zooplankton	9.88696
28	Zooplankton	9.89565
28	Zooplankton	9.93043
28	Zooplankton	9.95652
28	Zooplankton	10.0174
28	Zooplankton	10.0174
28	Zooplankton	10.0174
28	Zooplankton	10.1043
28	Zooplankton	10.1391
28	Zooplankton	10.2435
28	Zooplankton	10.2696
28	Zooplankton	10.2957
28	Zooplankton	10.3304
28	Zooplankton	10.3391
28	Zooplankton	10.3478
28	Zooplankton	10.3565
28	Zooplankton	10.487
28	Zooplankton	10.4957
28	Zooplankton	10.5391
28	Zooplankton	10.5391
28	Zooplankton	10.6174
28	Zooplankton	10.6348
28	Zooplankton	10.6435
28	Zooplankton	10.6435
28	Zooplankton	10.6783
28	Zooplankton	10.7739
28	Zooplankton	10.8087
28	Zooplankton	10.8348
28	Zooplankton	10.887
28	Zooplankton	10.9043
28	Zooplankton	10.9217
28	Zooplankton	10.9304
28	Zooplankton	10.9304
28	Zooplankton	10.9391
28	Zooplankton	11.4696
28	Zooplankton	11.8087
28	Zooplankton	11.8261
28	Zooplankton	11.9478
28	Zooplankton	12.087
30	Rotifers	6.73043
30	Rotifers	7.03478
30	Rotifers	7.14783
30	Rotifers	7.26957
30	Rotifers	7.43478
30	Rotifers	7.48696
30	Rotifers	7.52174
30	Rotifers	7.58261
30	Rotifers	7.69565
30	Rotifers	7.70435
30	Rotifers	7.73913
30	Rotifers	7.83478
30	Rotifers	7.90435
30	Rotifers	7.95652
30	Rotifers	8
30	Rotifers	8.11304
30	Rotifers	8.12174
30	Rotifers	8.14783
30	Rotifers	8.2087
30	Rotifers	8.25217
30	Rotifers	8.34783
30	Rotifers	8.34783
30	Rotifers	8.37391
30	Rotifers	8.38261
30	Rotifers	8.4
30	Rotifers	8.45217
30	Rotifers	8.46087
30	Rotifers	8.47826
30	Rotifers	8.48696
30	Rotifers	8.53043
30	Rotifers	8.58261
30	Rotifers	8.63478
30	Rotifers	8.66957
30	Rotifers	8.66957
30	Rotifers	8.68696
30	Rotifers	8.75652
30	Rotifers	8.77391
30	Rotifers	8.82609
30	Rotifers	8.84348
30	Rotifers	8.85217
30	Rotifers	8.92174
30	Rotifers	8.93043
30	Rotifers	8.93043
30	Rotifers	8.96522
30	Rotifers	9.04348
30	Rotifers	9.13043
30	Rotifers	9.2
30	Rotifers	9.2
30	Rotifers	9.23478
30	Rotifers	9.26957
30	Rotifers	9.27826
30	Rotifers	9.33043
30	Rotifers	9.33913
30	Rotifers	9.4
30	Rotifers	9.4087
30	Rotifers	9.4087
30	Rotifers	9.67826
30	Rotifers	9.74783
30	Rotifers	9.87826
30	Rotifers	10.0609
32	Zooplankton	9.81395
32	Zooplankton	10.0407
32	Zooplankton	10.6163
32	Zooplankton	10.8779
32	Zooplankton	11
32	Zooplankton	11.0407
32	Zooplankton	11.093
32	Zooplankton	11.093
32	Zooplankton	11.093
32	Zooplankton	11.1744
32	Zooplankton	11.343
32	Zooplankton	11.3895
32	Zooplankton	11.4012
32	Zooplankton	11.4186
32	Zooplankton	11.4942
32	Zooplankton	11.6279
32	Zooplankton	11.6977
32	Zooplankton	11.8547
32	Zooplankton	12.2442
32	Zooplankton	12.2965
32	Zooplankton	12.6047
32	Zooplankton	14.2151
36	Rotifers	6.46667
36	Rotifers	7.22667
36	Rotifers	7.56
36	Rotifers	7.96
36	Rotifers	8.01333
36	Rotifers	8.05333
36	Rotifers	8.09333
36	Rotifers	8.38667
36	Rotifers	8.54667
36	Rotifers	8.6
36	Rotifers	8.64
36	Rotifers	8.65333
36	Rotifers	8.66667
36	Rotifers	8.70667
36	Rotifers	8.72
36	Rotifers	8.77333
36	Rotifers	8.81333
36	Rotifers	8.82667
36	Rotifers	8.94667
36	Rotifers	8.98667
36	Rotifers	9.02667
36	Rotifers	9.04
36	Rotifers	9.06667
36	Rotifers	9.08
36	Rotifers	9.12
36	Rotifers	9.14667
36	Rotifers	9.18667
36	Rotifers	9.18667
36	Rotifers	9.2
36	Rotifers	9.28
36	Rotifers	9.28
36	Rotifers	9.33333
36	Rotifers	9.42667
36	Rotifers	9.44
36	Rotifers	9.53333
36	Rotifers	9.53333
36	Rotifers	9.58667
36	Rotifers	9.58667
36	Rotifers	9.61333
36	Rotifers	9.64
36	Rotifers	9.68
36	Rotifers	9.72
36	Rotifers	9.76
36	Rotifers	9.78667
36	Rotifers	9.86667
36	Rotifers	9.89333
36	Rotifers	9.90667
36	Rotifers	9.96
36	Rotifers	9.96
36	Rotifers	10.0533
36	Rotifers	10.2667
36	Rotifers	10.4667
36	Rotifers	10.5333
36	Rotifers	10.6
36	Rotifers	10.72
36	Rotifers	10.8667
36	Rotifers	11.0667
36	Rotifers	11.36
36	Rotifers	11.48
36	Zooplankton	9.72
36	Zooplankton	10.24
36	Zooplankton	10.24
36	Zooplankton	10.28
36	Zooplankton	10.3067
36	Zooplankton	10.8533
36	Zooplankton	11.4
36	Zooplankton	11.4
36	Zooplankton	11.4267
36	Zooplankton	11.6133
36	Zooplankton	11.68
36	Zooplankton	11.72
36	Zooplankton	11.7733
36	Zooplankton	11.8933
36	Zooplankton	11.9333
36	Zooplankton	11.9467
36	Zooplankton	11.96
36	Zooplankton	12.04
36	Zooplankton	12.0667
36	Zooplankton	12.2
36	Zooplankton	12.2
36	Zooplankton	12.3467
36	Zooplankton	12.4133
36	Zooplankton	12.4267
36	Zooplankton	12.4933
36	Zooplankton	12.5733
36	Zooplankton	12.6267
36	Zooplankton	12.64
36	Zooplankton	12.84
36	Zooplankton	12.8533
36	Zooplankton	12.9067
36	Zooplankton	12.9867
36	Zooplankton	13.0533
36	Zooplankton	13.1067
36	Zooplankton	13.28
36	Zooplankton	13.2933
36	Zooplankton	13.3333
36	Zooplankton	13.3467
36	Zooplankton	13.36
36	Zooplankton	13.5333
36	Zooplankton	13.64
36	Zooplankton	13.7467
36	Zooplankton	13.8133
36	Zooplankton	13.8533
36	Zooplankton	13.9067
36	Zooplankton	14.0267
36	Zooplankton	14.0533
36	Zooplankton	14.1067
36	Zooplankton	14.1733
36	Zooplankton	14.2267
36	Zooplankton	14.24
36	Zooplankton	14.24
36	Zooplankton	14.3067
36	Zooplankton	14.5467
36	Zooplankton	14.7867
36	Zooplankton	14.8933
36	Zooplankton	15.0667
36	Zooplankton	15.5067
36	Zooplankton	15.6933
36	Zooplankton	15.72
50	Rotifers	7.7
50	Rotifers	8
50	Rotifers	8
50	Rotifers	8.4
50	Rotifers	9
50	Rotifers	9.3
50	Rotifers	9.4
50	Rotifers	9.9
50	Rotifers	10
50	Rotifers	10.2
50	Rotifers	10.2
50	Rotifers	11.2
50	Rotifers	12
50	Rotifers	12.5
50	Rotifers	12.8
50	Rotifers	13
50	Rotifers	13
50	Rotifers	13.2
50	Rotifers	13.2
50	Rotifers	14.3
50	Rotifers	15.1
50	Zooplankton	16.1
50	Zooplankton	16.4
50	Zooplankton	16.9
50	Zooplankton	17
50	Zooplankton	17.5
50	Zooplankton	18.1
50	Zooplankton	18.2
50	Zooplankton	18.2
50	Zooplankton	18.6
50	Zooplankton	19
50	Zooplankton	19.1
50	Zooplankton	19.3
50	Zooplankton	19.8
50	Zooplankton	20
50	Zooplankton	20.1
50	Zooplankton	20.3
50	Zooplankton	21
50	Zooplankton	21
50	Zooplankton	21
50	Zooplankton	21.2
50	Zooplankton	21.2
50	Zooplankton	21.4
50	Zooplankton	21.5
50	Zooplankton	21.5
50	Zooplankton	21.5
50	Zooplankton	21.6
50	Zooplankton	21.9
50	Zooplankton	21.9
50	Zooplankton	22.2
50	Zooplankton	22.3
50	Zooplankton	22.4
50	Zooplankton	23.1
50	Zooplankton	23.2
50	Zooplankton	23.9
50	Zooplankton	24.1
50	Zooplankton	24.2
50	Zooplankton	24.5
50	Zooplankton	24.6
52	Zooplankton	18.1698
52	Zooplankton	18.8921
52	Zooplankton	18.9427
52	Zooplankton	19.0428
52	Zooplankton	19.1479
52	Zooplankton	19.191
52	Zooplankton	19.2137
52	Zooplankton	19.2803
52	Zooplankton	19.4391
52	Zooplankton	19.4906
52	Zooplankton	19.6515
52	Zooplankton	19.666
52	Zooplankton	19.7322
52	Zooplankton	19.7388
52	Zooplankton	19.8721
52	Zooplankton	19.883
52	Zooplankton	19.9923
52	Zooplankton	20.2513
52	Zooplankton	20.3847
52	Zooplankton	20.4723
52	Zooplankton	20.478
52	Zooplankton	20.5131
52	Zooplankton	20.5459
52	Zooplankton	20.5675
52	Zooplankton	20.6078
52	Zooplankton	20.6187
52	Zooplankton	20.6687
52	Zooplankton	20.7015
52	Zooplankton	20.7336
52	Zooplankton	20.8495
52	Zooplankton	20.8761
52	Zooplankton	20.9314
52	Zooplankton	20.9489
52	Zooplankton	20.956
52	Zooplankton	21.0212
52	Zooplankton	21.0902
52	Zooplankton	21.1735
52	Zooplankton	21.179
52	Zooplankton	21.2389
52	Zooplankton	21.2832
52	Zooplankton	21.2842
52	Zooplankton	21.3292
52	Zooplankton	21.3537
52	Zooplankton	21.3576
52	Zooplankton	21.4275
52	Zooplankton	21.5361
52	Zooplankton	21.71
52	Zooplankton	21.7528
52	Zooplankton	21.7712
52	Zooplankton	21.7942
52	Zooplankton	21.883
52	Zooplankton	21.9
52	Zooplankton	22.0127
52	Zooplankton	22.2846
52	Zooplankton	22.3209
52	Zooplankton	22.3542
52	Zooplankton	22.3875
52	Zooplankton	22.4159
52	Zooplankton	22.44
52	Zooplankton	22.4416
52	Zooplankton	22.5161
52	Zooplankton	22.5748
52	Zooplankton	22.5764
52	Zooplankton	22.7044
52	Zooplankton	22.8368
52	Zooplankton	22.9577
52	Zooplankton	22.9826
52	Zooplankton	23.0057
52	Zooplankton	23.1429
52	Zooplankton	23.2025
52	Zooplankton	23.3299
52	Zooplankton	23.3636
52	Zooplankton	23.3921
52	Zooplankton	23.4053
52	Zooplankton	23.4296
52	Zooplankton	23.5498
52	Zooplankton	23.5949
52	Zooplankton	23.6007
52	Zooplankton	23.7249
52	Zooplankton	23.7743
52	Zooplankton	23.871
52	Zooplankton	23.8945
52	Zooplankton	23.9212
52	Zooplankton	23.9415
52	Zooplankton	23.952
52	Zooplankton	24.0733
52	Zooplankton	24.09
52	Zooplankton	24.1038
52	Zooplankton	24.1509
52	Zooplankton	24.2775
52	Zooplankton	24.3068
52	Zooplankton	24.3329
52	Zooplankton	24.354
52	Zooplankton	24.5103
52	Zooplankton	24.5898
52	Zooplankton	24.6423
52	Zooplankton	24.7328
52	Zooplankton	24.8335
52	Zooplankton	24.8679
52	Zooplankton	24.8841
52	Zooplankton	24.9524
52	Zooplankton	25.0192
52	Zooplankton	25.0898
52	Zooplankton	25.2339
52	Zooplankton	25.2652
52	Zooplankton	25.3923
52	Zooplankton	25.4961
52	Zooplankton	25.5792
52	Zooplankton	25.5881
52	Zooplankton	25.7861
52	Zooplankton	25.7912
52	Zooplankton	25.9113
52	Zooplankton	25.9264
52	Zooplankton	25.9521
52	Zooplankton	26.0199
52	Zooplankton	26.0838
52	Zooplankton	26.2931
52	Zooplankton	26.3237
52	Zooplankton	26.3537
52	Zooplankton	26.5378
52	Zooplankton	26.6026
52	Zooplankton	26.7144
52	Zooplankton	26.7222
52	Zooplankton	26.8226
52	Zooplankton	26.8579
52	Zooplankton	26.9321
52	Zooplankton	27.0088
52	Zooplankton	27.3586
52	Zooplankton	27.4905
52	Zooplankton	27.6278
52	Zooplankton	27.631
52	Zooplankton	27.8052
52	Zooplankton	27.921
52	Zooplankton	28.2458
52	Zooplankton	28.4685
52	Zooplankton	28.552
52	Zooplankton	28.7395
52	Zooplankton	28.8055
52	Zooplankton	28.9076
52	Zooplankton	29.9044
52	Zooplankton	30.1382
52	Zooplankton	30.3413
52	Zooplankton	30.5368
52	Zooplankton	30.75
52	Zooplankton	31.1688
52	Zooplankton	31.4086
52	Zooplankton	31.5596
53	Rotifers	9.97143
53	Rotifers	10.0571
53	Rotifers	10.0571
53	Rotifers	10.2
53	Rotifers	10.2429
53	Rotifers	10.3429
53	Rotifers	10.6857
53	Rotifers	11.0571
53	Rotifers	11.0571
53	Rotifers	11.1571
53	Rotifers	11.2571
53	Rotifers	11.2714
53	Rotifers	11.3
53	Rotifers	11.4286
53	Rotifers	11.4286
53	Rotifers	11.4571
53	Rotifers	11.5429
53	Rotifers	11.6
53	Rotifers	11.7286
53	Rotifers	11.7286
53	Rotifers	11.7857
53	Rotifers	11.8143
53	Rotifers	11.8143
53	Rotifers	11.8571
53	Rotifers	11.9286
53	Rotifers	11.9857
53	Rotifers	12
53	Rotifers	12.1286
53	Rotifers	12.2286
53	Rotifers	12.3571
53	Rotifers	12.4
53	Rotifers	12.6286
53	Rotifers	12.8286
53	Rotifers	12.8571
53	Rotifers	12.8571
53	Rotifers	12.9143
53	Rotifers	12.9143
53	Rotifers	12.9714
53	Rotifers	13
53	Rotifers	13
53	Rotifers	13.0143
53	Rotifers	13.0714
53	Rotifers	13.1286
53	Rotifers	13.2286
53	Rotifers	13.2571
53	Rotifers	13.4143
53	Rotifers	13.4286
53	Rotifers	13.4857
53	Rotifers	13.5143
53	Rotifers	13.7857
53	Rotifers	13.7857
53	Rotifers	14.0571
53	Rotifers	14.1
53	Rotifers	14.2143
53	Rotifers	14.2286
53	Rotifers	14.3571
53	Rotifers	14.4286
53	Rotifers	14.7
53	Rotifers	14.8286
53	Rotifers	14.8714
53	Rotifers	14.9286
53	Rotifers	14.9571
53	Rotifers	15.1286
53	Rotifers	15.1286
53	Rotifers	15.1571
53	Rotifers	15.2429
53	Rotifers	15.6
53	Rotifers	15.6571
53	Rotifers	15.7143
53	Rotifers	15.7857
53	Rotifers	15.9
53	Rotifers	15.9143
53	Rotifers	16.0143
53	Rotifers	16.1571
53	Rotifers	16.1857
53	Rotifers	16.2
53	Rotifers	16.2143
53	Rotifers	16.2286
53	Rotifers	16.3286
53	Rotifers	16.3857
53	Rotifers	16.4286
53	Rotifers	16.6714
53	Rotifers	16.9429
53	Rotifers	17.1714
53	Rotifers	17.3143
53	Rotifers	17.3429
53	Rotifers	17.4
53	Rotifers	17.7
53	Rotifers	17.7143
53	Rotifers	17.8429
53	Rotifers	17.9
53	Rotifers	17.9857
53	Rotifers	18.1429
53	Rotifers	18.2286
53	Rotifers	18.3714
53	Rotifers	18.4143
53	Rotifers	18.7143
53	Rotifers	18.7286
53	Rotifers	18.8714
53	Rotifers	19.2857
53	Rotifers	21.3
53	Rotifers	22.2
53	Rotifers	23.1286
63	Rotifers	14.6721
63	Rotifers	15.041
63	Rotifers	15.876
63	Rotifers	15.9426
63	Rotifers	16.6038
63	Rotifers	16.6577
63	Rotifers	17.0082
63	Rotifers	17.2131
63	Rotifers	17.4394
63	Rotifers	17.7049
63	Rotifers	17.7049
63	Rotifers	18.1148
63	Rotifers	18.3197
63	Rotifers	18.5656
63	Rotifers	18.6066
63	Rotifers	18.7295
63	Rotifers	18.9344
63	Rotifers	18.9488
63	Rotifers	19.0566
63	Rotifers	20.6148
63	Rotifers	20.9836
63	Rotifers	21.1885
63	Rotifers	21.2295
63	Rotifers	21.2705
63	Rotifers	22.9098
63	Rotifers	22.9098
63	Rotifers	22.9111
63	Rotifers	23.4232
63	Rotifers	23.8934
70	Rotifers	20.4491
70	Rotifers	21.0461
70	Rotifers	21.2369
70	Rotifers	21.2794
70	Rotifers	21.3941
70	Rotifers	21.9133
70	Rotifers	22.2132
70	Rotifers	22.2242
70	Rotifers	22.367
70	Rotifers	22.5121
70	Rotifers	22.6248
70	Rotifers	22.7005
70	Rotifers	22.9271
70	Rotifers	22.9376
70	Rotifers	23.0223
70	Rotifers	23.1943
70	Rotifers	23.2009
70	Rotifers	23.382
70	Rotifers	23.4786
70	Rotifers	23.5413
70	Rotifers	23.8317
70	Rotifers	23.8335
70	Rotifers	23.9081
70	Rotifers	24.0015
70	Rotifers	24.1129
70	Rotifers	24.1392
70	Rotifers	24.2082
70	Rotifers	24.2728
70	Rotifers	24.2928
70	Rotifers	24.3026
70	Rotifers	24.3048
70	Rotifers	24.3112
70	Rotifers	24.3552
70	Rotifers	24.403
70	Rotifers	24.4224
70	Rotifers	24.4311
70	Rotifers	24.5676
70	Rotifers	24.6023
70	Rotifers	24.608
70	Rotifers	24.6252
70	Rotifers	24.7887
70	Rotifers	24.8646
70	Rotifers	24.9251
70	Rotifers	24.948
70	Rotifers	24.9729
70	Rotifers	25.1204
70	Rotifers	25.2094
70	Rotifers	25.2745
70	Rotifers	25.3859
70	Rotifers	25.3883
70	Rotifers	25.4942
70	Rotifers	25.505
70	Rotifers	25.6842
70	Rotifers	25.7619
70	Rotifers	25.7861
70	Rotifers	25.8576
70	Rotifers	26.0123
70	Rotifers	26.037
70	Rotifers	26.1277
70	Rotifers	26.2214
70	Rotifers	26.7538
70	Rotifers	26.9133
70	Rotifers	26.9182
70	Rotifers	26.9563
70	Rotifers	27.0207
70	Rotifers	27.0306
70	Rotifers	27.3591
70	Rotifers	27.4607
70	Rotifers	27.4639
70	Rotifers	27.499
70	Rotifers	27.5039
70	Rotifers	27.5244
70	Rotifers	27.6723
70	Rotifers	27.7273
70	Rotifers	27.7331
70	Rotifers	27.7508
70	Rotifers	27.7689
70	Rotifers	27.7922
70	Rotifers	28.0431
70	Rotifers	28.1545
70	Rotifers	28.2727
70	Rotifers	28.3019
70	Rotifers	28.3206
70	Rotifers	28.5132
70	Rotifers	28.5231
70	Rotifers	28.5326
70	Rotifers	28.6558
70	Rotifers	28.8185
70	Rotifers	28.8485
70	Rotifers	29.0584
70	Rotifers	29.4632
70	Rotifers	29.499
70	Rotifers	29.5858
70	Rotifers	29.8056
70	Rotifers	29.9006
70	Rotifers	30.1066
70	Rotifers	30.2715
70	Rotifers	30.4688
70	Rotifers	30.4968
70	Rotifers	30.5882
70	Rotifers	30.7431
70	Rotifers	30.8094
70	Rotifers	30.9601
70	Rotifers	30.9831
70	Rotifers	31.4789
70	Rotifers	31.5447
70	Rotifers	31.5662
70	Rotifers	32.9367
70	Rotifers	33.1348
70	Rotifers	33.3747
70	Rotifers	33.5484
70	Rotifers	34.3578
70	Rotifers	34.7688
70	Zooplankton	33.6982
70	Zooplankton	36.587
70	Zooplankton	36.6492
70	Zooplankton	37.2356
70	Zooplankton	38.2483
70	Zooplankton	39.8305
70	Zooplankton	40.1335
70	Zooplankton	40.1617
70	Zooplankton	43.5256
70	Zooplankton	44.2812
70	Zooplankton	47.3559
73	Zooplankton	10.3535
73	Zooplankton	35.2429
73	Zooplankton	36.9211
73	Zooplankton	37.4345
73	Zooplankton	38.3118
73	Zooplankton	38.6976
73	Zooplankton	38.8873
73	Zooplankton	39.0526
73	Zooplankton	39.3197
73	Zooplankton	39.5105
73	Zooplankton	39.5859
73	Zooplankton	40.4896
73	Zooplankton	40.8057
73	Zooplankton	41.0215
73	Zooplankton	41.3671
73	Zooplankton	41.8276
73	Zooplankton	42.0976
73	Zooplankton	42.2043
73	Zooplankton	42.3554
73	Zooplankton	42.5116
73	Zooplankton	42.5519
73	Zooplankton	42.8239
73	Zooplankton	42.8571
73	Zooplankton	43.6019
73	Zooplankton	43.7314
73	Zooplankton	43.9607
73	Zooplankton	44.1176
73	Zooplankton	44.2842
73	Zooplankton	44.7182
73	Zooplankton	45.1353
73	Zooplankton	45.3857
73	Zooplankton	45.4039
73	Zooplankton	45.424
73	Zooplankton	45.5035
73	Zooplankton	45.562
73	Zooplankton	45.6815
73	Zooplankton	45.8134
73	Zooplankton	45.8394
73	Zooplankton	45.9241
73	Zooplankton	45.9456
73	Zooplankton	45.9682
73	Zooplankton	46.0805
73	Zooplankton	46.1494
73	Zooplankton	46.2104
73	Zooplankton	46.2154
73	Zooplankton	46.2308
73	Zooplankton	46.3596
73	Zooplankton	46.4079
73	Zooplankton	46.4576
73	Zooplankton	46.6834
73	Zooplankton	46.804
73	Zooplankton	46.8822
73	Zooplankton	47.0674
73	Zooplankton	47.0784
73	Zooplankton	47.1412
73	Zooplankton	47.2709
73	Zooplankton	47.4244
73	Zooplankton	47.4302
73	Zooplankton	47.5328
73	Zooplankton	47.6384
73	Zooplankton	47.6596
73	Zooplankton	47.7222
73	Zooplankton	47.726
73	Zooplankton	47.812
73	Zooplankton	47.8155
73	Zooplankton	47.8632
73	Zooplankton	47.9316
73	Zooplankton	47.9502
73	Zooplankton	47.9888
73	Zooplankton	48.0507
73	Zooplankton	48.093
73	Zooplankton	48.1567
73	Zooplankton	48.1919
73	Zooplankton	48.293
73	Zooplankton	48.3989
73	Zooplankton	48.4051
73	Zooplankton	48.4244
73	Zooplankton	48.4783
73	Zooplankton	48.5113
73	Zooplankton	48.522
73	Zooplankton	48.5756
73	Zooplankton	48.7241
73	Zooplankton	48.8478
73	Zooplankton	48.8953
73	Zooplankton	48.91
73	Zooplankton	49.147
73	Zooplankton	49.2025
73	Zooplankton	49.2941
73	Zooplankton	49.4608
73	Zooplankton	49.5424
73	Zooplankton	49.5684
73	Zooplankton	49.5911
73	Zooplankton	49.6721
73	Zooplankton	49.7373
73	Zooplankton	49.7394
73	Zooplankton	49.7576
73	Zooplankton	49.8697
73	Zooplankton	49.8866
73	Zooplankton	49.8901
73	Zooplankton	50.0272
73	Zooplankton	50.1454
73	Zooplankton	50.1636
73	Zooplankton	50.1763
73	Zooplankton	50.2421
73	Zooplankton	50.2568
73	Zooplankton	50.2941
73	Zooplankton	50.3505
73	Zooplankton	50.3644
73	Zooplankton	50.4754
73	Zooplankton	50.5008
73	Zooplankton	50.613
73	Zooplankton	50.7983
73	Zooplankton	50.8047
73	Zooplankton	50.838
73	Zooplankton	50.8752
73	Zooplankton	50.8819
73	Zooplankton	50.9432
73	Zooplankton	51.1128
73	Zooplankton	51.1559
73	Zooplankton	51.2721
73	Zooplankton	51.2727
73	Zooplankton	51.3808
73	Zooplankton	51.4137
73	Zooplankton	51.5695
73	Zooplankton	51.776
73	Zooplankton	51.8282
73	Zooplankton	51.9264
73	Zooplankton	51.9722
73	Zooplankton	52.0066
73	Zooplankton	52.0446
73	Zooplankton	52.31
73	Zooplankton	52.3945
73	Zooplankton	52.6012
73	Zooplankton	52.6153
73	Zooplankton	52.7188
73	Zooplankton	52.7612
73	Zooplankton	52.9514
73	Zooplankton	53.152
73	Zooplankton	53.1656
73	Zooplankton	53.3306
73	Zooplankton	53.7591
73	Zooplankton	53.8527
73	Zooplankton	53.873
73	Zooplankton	54.0912
73	Zooplankton	54.472
73	Zooplankton	54.5187
73	Zooplankton	54.5833
73	Zooplankton	54.6084
73	Zooplankton	54.6087
73	Zooplankton	54.6748
73	Zooplankton	54.8403
73	Zooplankton	54.9854
73	Zooplankton	55.3112
73	Zooplankton	55.3363
73	Zooplankton	55.3611
73	Zooplankton	55.5278
73	Zooplankton	55.672
73	Zooplankton	55.7781
73	Zooplankton	55.8517
73	Zooplankton	56.2347
73	Zooplankton	56.6411
73	Zooplankton	56.8625
73	Zooplankton	56.9942
73	Zooplankton	57.1013
73	Zooplankton	57.5531
73	Zooplankton	57.8163
73	Zooplankton	57.9065
73	Zooplankton	58.2362
73	Zooplankton	58.5888
73	Zooplankton	58.686
73	Zooplankton	63.1689
73	Zooplankton	63.2479
84	Rotifers	34.3622
84	Rotifers	34.5937
84	Rotifers	35.4573
84	Rotifers	35.9107
84	Rotifers	36.0475
84	Rotifers	38.343
84	Rotifers	39.2585
84	Rotifers	39.3511
84	Rotifers	39.713
84	Rotifers	40.0345
84	Rotifers	40.4714
84	Rotifers	40.8783
84	Rotifers	40.9441
84	Rotifers	41.3189
84	Rotifers	41.6365
84	Rotifers	41.6623
84	Rotifers	41.8776
84	Rotifers	42.0455
84	Rotifers	42.0782
84	Rotifers	42.1999
84	Rotifers	42.6357
84	Rotifers	42.6445
84	Rotifers	42.6618
84	Rotifers	43.0548
84	Rotifers	43.2423
84	Rotifers	43.3168
84	Rotifers	43.3722
84	Rotifers	43.8163
84	Rotifers	43.9371
84	Rotifers	43.9457
84	Rotifers	44.1296
84	Rotifers	44.1558
84	Rotifers	44.1868
84	Rotifers	44.2183
84	Rotifers	44.27
84	Rotifers	44.2774
84	Rotifers	44.5313
84	Rotifers	44.5372
84	Rotifers	44.7683
84	Rotifers	44.9735
84	Rotifers	45.0943
84	Rotifers	45.1826
84	Rotifers	45.503
84	Rotifers	45.7676
84	Rotifers	46.4859
84	Rotifers	46.5236
84	Rotifers	46.5812
84	Rotifers	46.6667
84	Rotifers	46.89
84	Rotifers	47.1949
84	Rotifers	47.3495
84	Rotifers	47.4705
84	Rotifers	47.5013
84	Rotifers	47.5244
84	Rotifers	47.5279
84	Rotifers	47.9299
84	Rotifers	47.9717
84	Rotifers	48.085
84	Rotifers	48.1013
84	Rotifers	48.1651
84	Rotifers	48.1792
84	Rotifers	48.2829
84	Rotifers	48.3193
84	Rotifers	48.4009
84	Rotifers	48.6368
84	Rotifers	49.5671
84	Rotifers	49.6134
84	Rotifers	49.7457
84	Rotifers	49.9585
84	Rotifers	50.0426
84	Rotifers	50.063
84	Rotifers	50.3525
84	Rotifers	50.3673
84	Rotifers	50.409
84	Rotifers	50.4146
84	Rotifers	50.4725
84	Rotifers	50.5711
84	Rotifers	50.5952
84	Rotifers	50.7246
84	Rotifers	50.8048
84	Rotifers	50.8632
84	Rotifers	51.1012
84	Rotifers	51.4445
84	Rotifers	51.6149
84	Rotifers	51.6582
84	Rotifers	51.84
84	Rotifers	52.027
84	Rotifers	52.3066
84	Rotifers	52.7813
84	Rotifers	53.3499
84	Rotifers	53.3499
84	Rotifers	53.6013
84	Rotifers	53.7754
84	Rotifers	53.9088
84	Rotifers	53.9308
84	Rotifers	53.934
84	Rotifers	54.1029
84	Rotifers	54.2909
84	Rotifers	54.9656
84	Rotifers	55.2779
84	Rotifers	55.366
84	Rotifers	55.5015
84	Rotifers	55.5902
84	Rotifers	55.6995
84	Rotifers	56.1798
84	Rotifers	56.3424
84	Rotifers	56.5945
84	Rotifers	56.7901
84	Rotifers	57.3849
84	Rotifers	58.5781
84	Rotifers	58.6936
84	Rotifers	59.4208
84	Rotifers	59.6415
84	Rotifers	59.7394
84	Rotifers	59.7553
84	Rotifers	59.9935
84	Rotifers	60.6547
84	Rotifers	61.3325
84	Rotifers	62.0678
84	Rotifers	62.6022
84	Rotifers	63.2277
84	Rotifers	64.7239
