# Supplementary material for: Copepods enhance nutritional status, growth and development in Atlantic cod (Gadus morhua L.) larvae — can we identify the underlying factors?
Source: PeerJ. 2015 May 19;3:e902. doi: 10.7717/peerj.902 (PMC4451035; doi:10.7717/peerj.902)
Supplement: Supplemental Information 4 [file peerj-03-902-s004.xlsx]

## Sheet: Fed 2012
Experiment-1 (Exp-1) 2012 - Prey added /day/tank							X 1000000
	Standard Zooplankton		Intensive				Standard Zooplankton		Intensive
Age (dph)	Copepod Nauplii	Copepodids/Copepods	Rotifers	Artemia		Age (dph)	Copepod Nauplii	Copepodids/Copepods	Rotifers	Artemia
0						0
1						1
2						2
3						3
4	856000		3500000			4	0.856		3.5
5	745000		5000000			5	0.745		5
6	1.02667e+06		5000000			6	1.02667		5
7	1715000		5000000			7	1.715		5
8	2035000	95000	5000000			8	2.035	0.095	5
9	3115000	145000	7000000			9	3.115	0.145	7
10	3005000	110000	6000000			10	3.005	0.11	6
11	3880000	145000	7600000			11	3.88	0.145	7.6
12	4760000	155000	9000000			12	4.76	0.155	9
13	4980000	165000	9000000			13	4.98	0.165	9
14	5380000	230000	9000000			14	5.38	0.23	9
15	5655000	135000	12000000			15	5.655	0.135	12
16	6500000	185000	12000000			16	6.5	0.185	12
17	6005000	145000	13000000			17	6.005	0.145	13
18	7022500	193500	16000000			18	7.0225	0.1935	16
19	8494000	423000	18000000			19	8.494	0.423	18
20	9335000	895000	18000000			20	9.335	0.895	18
21	1.10902e+07	1.11917e+06	18000000			21	11.0902	1.11917	18
22	11631000	1806000	20000000			22	11.631	1.806	20
23	16709000	1886000	20000000			23	16.709	1.886	20
24	21909000	3196000	23000000			24	21.909	3.196	23
25	17035000	2695000	35000000			25	17.035	2.695	35
26	15725000	4260000	35000000			26	15.725	4.26	35
27	19785000	6320000	40000000			27	19.785	6.32	40
28	16372500	5177500	40000000			28	16.3725	5.1775	40
29	11830000	3685000	45000000			29	11.83	3.685	45
30	13970000	7700000	45000000			30	13.97	7.7	45
31	10000000	9135000	45000000			31	10	9.135	45
32	12740000	8970000	29000000	1000000		32	12.74	8.97	29	1
33	8460000	12000000	29000000	1000000		33	8.46	12	29	1
34	9.42967e+06	9.44567e+06	29000000	2000000		34	9.42967	9.44567	29	2
35	9575000	13650000	29000000	2000000		35	9.575	13.65	29	2
36	4320000	5910000		6500000		36	4.32	5.91		6.5
37	5738000	12040000		7000000		37	5.738	12.04		7
38	2980000	10850000		7000000		38	2.98	10.85		7
39	540000	2980000		7000000		39	0.54	2.98		7
40	150000	3300000		10000000		40	0.15	3.3		10
41	130000	4680000		11000000		41	0.13	4.68		11
42	40000	2360000		11000000		42	0.04	2.36		11
43	80000	2550000		13000000		43	0.08	2.55		13
44	20000	2070000		13000000		44	0.02	2.07		13
45				13000000		45				13
46				14000000		46				14
47				14000000		47				14
48				14000000		48				14
49				14000000		49				14
50				14000000		50				14
51				14000000		51				14
52				14000000		52				14
53				14000000		53				14
54				13000000		54				13
55				13000000		55				13
56				14000000		56				14
57				14000000		57				14
58				5000000		58				5
59				5000000		59				5
60				5000000		60				5
61				5000000		61				5
62				5000000		62				5
63				5000000		63				5

## Sheet: Fed 2013
Oppfølgingsforsøket 2013 - Byttedyr pr. dag pr. kar
	Standard Zoo (stor)		Små Zoo		Intensiv				Standard Zoo (stor)*1000		Små Zoo *1000		Intensiv *1000
Alder (dph)	Copepod Nauplii	Copepodids/Copepods	Nauplii	Copdt/Cop	Rotifers	Artemia		Alder (dph)	Copepod Nauplii	Copepodids/Copepods	Copepod Nauplii	Copepodids/Copepods	Rotifers	Artemia
0								0									0
1								1									1
2								2									2
3								3									3
4	303800	24800	303800	24800	300000			4	0.3038	0.0248	0.3038	0.0248	0.3				4	303.8	24.8	303.8	24.8	300
5	457200	9000	457200	9000	450000			5	0.4572	0.009	0.4572	0.009	0.45				5	457.2	9	457.2	9	450
6	450000	5400	450000	5400	450000			6	0.45	0.0054	0.45	0.0054	0.45				6	450	5.4	450	5.4	450
7	411750	47250	411750	47250	400000			7	0.41175	0.04725	0.41175	0.04725	0.4				7	411.75	47.25	411.75	47.25	400
8	447500	32500	447500	32500	444015			8	0.4475	0.0325	0.4475	0.0325	0.444015				8	447.5	32.5	447.5	32.5	444.015
9	582500	17500	582500	17500	600000			9	0.5825	0.0175	0.5825	0.0175	0.6				9	582.5	17.5	582.5	17.5	600
10	768000	45000	768000	45000	813000			10	0.768	0.045	0.768	0.045	0.813				10	768	45	768	45	813
11	871500	73500	871500	73500	1074375			11	0.8715	0.0735	0.8715	0.0735	1.07438				11	871.5	73.5	871.5	73.5	1074.38
12	768000	58000	768000	58000	763560			12	0.768	0.058	0.768	0.058	0.76356				12	768	58	768	58	763.56
13	973667	34500	973667	34500	1064000			13	0.973667	0.0345	0.973667	0.0345	1.064				13	973.667	34.5	973.667	34.5	1064
14	1220000	50000	1220000	50000	1080000			14	1.22	0.05	1.22	0.05	1.08				14	1220	50	1220	50	1080
15	1125750	28500	1125750	28500	1215000			15	1.12575	0.0285	1.12575	0.0285	1.215				15	1125.75	28.5	1125.75	28.5	1215
16	1345000	280000	1345000	280000	1610250			16	1.345	0.28	1.345	0.28	1.61025				16	1345	280	1345	280	1610.25
17	1.46233e+06	251333	1.46233e+06	251333	1906480			17	1.46233	0.251333	1.46233	0.251333	1.90648				17	1462.33	251.333	1462.33	251.333	1906.48
18	1012000	184000	1012000	184000	1219350			18	1.012	0.184	1.012	0.184	1.21935				18	1012	184	1012	184	1219.35
19	1.06667e+06	150730	1.06667e+06	150730	1.29524e+06			19	1.06667	0.15073	1.06667	0.15073	1.29524				19	1066.67	150.73	1066.67	150.73	1295.24
20	807733	106669	807733	106669	905000			20	0.807733	0.106669	0.807733	0.106669	0.905				20	807.733	106.669	807.733	106.669	905
21	896833	61333.3	896833	61333.3	999000			21	0.896833	0.0613333	0.896833	0.0613333	0.999				21	896.833	61.3333	896.833	61.3333	999
22	680000	228000	740000	180000	888900			22	0.68	0.228	0.74	0.18	0.8889				22	680	228	740	180	888.9
23	604333	81666.7	543900	73500	676000			23	0.604333	0.0816667	0.5439	0.0735	0.676				23	604.333	81.6667	543.9	73.5	676
24	885750	57166.7	885750	57166.7	970700			24	0.88575	0.0571667	0.88575	0.0571667	0.9707				24	885.75	57.1667	885.75	57.1667	970.7
25	1215000	33000	1215000	33000	1130500			25	1.215	0.033	1.215	0.033	1.1305				25	1215	33	1215	33	1130.5
26	1.41883e+06	21333.3	1.41883e+06	21333.3	1367040			26	1.41883	0.0213333	1.41883	0.0213333	1.36704				26	1418.83	21.3333	1418.83	21.3333	1367.04
27	1192000	14133.3	1192000	14133.3	1205775			27	1.192	0.0141333	1.192	0.0141333	1.20578				27	1192	14.1333	1192	14.1333	1205.78
28	1008000	50000	1084000	10000	1090480			28	1.008	0.05	1.084	0.01	1.09048				28	1008	50	1084	10	1090.48
29	970667	84666.7	1137500	0	710000			29	0.970667	0.0846667	1.1375		0.71				29	970.667	84.6667	1137.5		710
30	995000	95000	1146000	0	1.0887e+06			30	0.995	0.095	1.146		1.0887				30	995	95	1146		1088.7
31	1043000	63500	1258000	0	1.28316e+06			31	1.043	0.0635	1.258		1.28316				31	1043	63.5	1258		1283.16
32	959333	61666.7	1044000	0	1.01268e+06			32	0.959333	0.0616667	1.044		1.01268				32	959.333	61.6667	1044		1012.68
33	291667	93416.7	668750	0	900000			33	0.291667	0.0934167	0.66875		0.9				33	291.667	93.4167	668.75		900
34	58000	199833	1275000	0		250000		34	0.058	0.199833	1.275			0.25			34	58	199.833	1275			250
35	0	138367	1.18533e+06	0		137000		35		0.138367	1.18533			0.137			35		138.367	1185.33			137
36	0	189000	1.90067e+06	0		189000		36		0.189	1.90067			0.189			36		189	1900.67			189
37	0	152917	2019000	0		189000		37		0.152917	2.019			0.189			37		152.917	2019			189
38	0	141500	2.18767e+06	0		195000		38		0.1415	2.18767			0.195			38		141.5	2187.67			195
39	0	124100	2.28567e+06	0		195000		39		0.1241	2.28567			0.195			39		124.1	2285.67			195
40	0	126733	2317000	0		195000		40		0.126733	2.317			0.195			40		126.733	2317			195
41	0	132550	2415000	0		195000		41		0.13255	2.415			0.195			41		132.55	2415			195
42	0	141600	2467500	0		195000		42		0.1416	2.4675			0.195			42		141.6	2467.5			195
43	0	181500	2808000	0		195000		43		0.1815	2.808			0.195			43		181.5	2808			195
44	0	224133	2.89467e+06	0		195000		44		0.224133	2.89467			0.195			44		224.133	2894.67			195
45	0	309700	3.03067e+06	0		205000		45		0.3097	3.03067			0.205			45		309.7	3030.67			205
46	0	365333	3.10833e+06	0		210000		46		0.365333	3.10833			0.21			46		365.333	3108.33			210
