# Supplementary material for: Copepods enhance nutritional status, growth and development in Atlantic cod (Gadus morhua L.) larvae — can we identify the underlying factors?
Source: PeerJ. 2015 May 19;3:e902. doi: 10.7717/peerj.902 (PMC4451035; doi:10.7717/peerj.902)
Supplement: Supplemental Information 6 [file peerj-03-902-s006.xlsx]

## Sheet: Protein, Taurine, vit., min.
Project:	3572	CODE
J. number NIFES	2013-712
			Dry matter	Protein	Taurin,	Vitamin A1	Vitamin A2	Tiamin -HCl	Vitamin C	Vitamin-D3	Vitamin E (alfa-tokoferol.)	Mn	Fe	Cu	Zn	Se	Ca	Na	K	Mg	P	Iodine
			g/100g	g/100g DM	µmol/g DW	g/100g DM	g/100g DM	g/100g DM	g/100g DM	g/100g DM	g/100g DM	g/100g DM	g/100g DM	g/100g DM	g/100g DM	g/100g DM	g/100g DM	g/100g DM	g/100g DM	g/100g DM	g/100g DM	g/100g DM
2013-712/1	artemia 06.06.13	Artemia	5.11	53.4247	40.2935	<0.06	<0.1	<2.0	141.964	0.391389	919.765	3.5225	97.8474	14.4814	156.556	2.73973	1507	23483	15264	1898	11155	2.2
2013-712/2	rotatorier 01.05.13	Rotifers	10.59	35.3768	0.717658	<0.06	<0.1	14.1643	185.05	0.188857	878.187	7.08215	226.629	16.9972	47.2144	0.547686	2927	35883	9443	4533	8215	1.2
2013-712/3	rotatorier 15.05.13	Rotofers	13.96	39.2966	0.723496	<0.06	<0.1	20.7736	38.3506	0.2149	637.536	7.87966	279.37	12.1777	57.3066	0.272206	2149	24355	9312	3223	10029	0.9
2013-712/4	plankt.13.4 80-150	Small plankton	11.8	60.6356	59.0508	<0.06	<0.1	5.9322	156.135	<0.08	84.7458	55.0847	2796.61	55.0847	466.102	3.38983	1864	18644	10169	3220	10169	39
2013-712/5	plankt.13.4 150-180	Large plankton	12.23	68.0376	66.9419	<0.06	<0.1	6.54129	48.7265	<0.09	98.1194	18.8062	981.194	18.8062	564.186	3.67948	1390	24530	13900	3352	13900	25
2013-712/6	plankt.26.4 80-150	Small plankton	14.85	55.6768	59.5017	<0.06	<0.1	4.0404	131.926	<0.10	107.744	80.8081	1952.86	16.1616	424.242	2.89562	13468	51178	13468	5724	12121	52
2013-712/7	plankt.26.4 180-250	Large plankton	13.94	69.5768	59.9139	<0.06	<0.1	3.5868	116.423	<0.11	157.819	12.9125	344.333	19.3687	695.839	4.30416	2511	38737	16499	4878	11478	15
2013-712/8	plankt.9.5 80-150	Small plankton	19.62	44.842	0	<0.06	<0.1	1.52905	276.028	<0.12	107.034	163.099	4128.44	14.2712	397.554	2.70133	86646	32620	9684	4893	8665	87
2013-712/9	plankt.9.5 180-250	Large plankton	14.73	64.406	61.6904	<0.06	<0.1	4.07332	49.353	<0.13	122.2	19.0088	563.476	12.22	882.553	4.2091	2919	53632	13578	6110	12899	16

## Sheet: Fatty acids, FAME
Project:	3572	CODE
J. number NIFES	2013-712
		2013-712/1	2013-712/2	2013-712/3	2013-712/4	2013-712/5	2013-712/6	2013-712/7	2013-712/8	2013-712/9
		artemia 06.06.13	rotifers 01.05.13	rotifers 15.05.13	plankt.13.4 80-150	plankt.13.4 150-180	plankt.26.4 80-150	plankt.26.4 180-250	plankt.9.5 80-150	plankt.9.5 180-250
					nauplii	copepodits	nauplii	copepodites	nauplii	copepodites
Dry matter	g/100g wet wt	5.11	10.59	13.96	11.8	12.23	14.85	13.94	19.62	14.73
14:0 %	% total FA	2.1	4.6	4.1	6.8	5.2	3.1	2.5	4.9	3.3
16:0 %	% total FA	15.6	20.1	17.9	15.5	14.6	15.1	16.2	13	16.1
16:1n-7 %	% total FA	1.9	2.4	3.8	7.3	2.9	2	1.2	5.5	2.2
18:0 %	% total FA	4.6	1.3	1.5	2	1.5	3	2.1	3.3	2.3
18:1n-9 %	% total FA	14.2	2.2	3	1.6	1.4	1.1	1.4	2.5	4
18:1n-7 %	% total FA	5.6	1	1.1	1.6	1.4	1.8	1.3	2.4	1
18:2n-6 %	% total FA	4.7	3.3	3.3	1.2	1.3	0.9	1.1	1.5	1.6
18:3n-3 %	% total FA	19.4	0.7	0.9	1.4	2.5	1.4	2.2	1.3	1.4
18:4n-3 %	% total FA	2.3	0.3	0.4	2.1	3.6	2.3	2.8	3.1	1.8
20:4n-6 %	% total FA	2.9	1.9	2	0.6	0.4	0.7	0.6	1.5	0.9
20:5n-3 EPA %	% total FA	5.1	5	5	15.4	19.5	18.9	20.2	19.8	19.4
22:5n-6 %	% total FA	3.2	11.7	11.6	1	0.3	0.6	0.7	0.6	0.9
22:5n-3 %	% total FA	0.3	1.9	1.7	0.7	0.6	0.7	0.5	1.6	0.5
22:6n-3 DHA %	% total FA	9.1	33.8	32.5	33.2	36.8	37.6	38.1	21.1	34.2
Sum unidentified %	% total FA	3	2.6	3.7	4.2	2.9	4.2	2.3	8.1	2.4
Sum identified %	% total FA	97	97.4	96.3	95.8	97.1	95.8	97.7	91.9	97.6
Sum fatty acids %	% total FA	100	100	100	100	100	100	100	100	100
Sum saturated %	% total FA	24	28.3	25.7	26.2	22.6	23.1	23	23.3	24
Sum 16:1 %	% total FA	2.8	2.5	4	7.7	3.1	2.5	1.5	6.5	2.7
Sum 18:1 %	% total FA	19.8	3.2	4.1	3.2	2.9	2.9	2.8	5	5
Sum 20:1 %	% total FA	0.5	0.8	1	0.2	0.4	0.9	0.5	2.4	0.9
Sum 22:1 %	% total FA	0.1	0.2	0.3	0.2	0.2	0.5	1	0.1	1
Sum monoenes %	% total FA	23.5	6.9	9.5	11.7	6.9	7.2	6.6	14.3	11.1
Sum EPA + DHA %	% total FA	14.2	38.8	37.5	48.7	56.3	56.6	58.2	40.8	53.6
Sum n-3 %	% total FA	37.4	43.9	42.8	53.8	64.5	62.2	64.9	48.9	58.2
Sum n-6 %	% total FA	11.6	18.2	18.1	3.6	2.7	3	3	4.8	4.1
Sum polyunsaturated %	% total FA	49.5	62.2	61.1	57.9	67.5	65.4	68.1	54.2	62.5
n-3/n-6	-	3.2	2.4	2.4	15	23.5	20.8	21.3	10.1	14.3
Sum fatty acids	mg/g wet wt	8.62	22	25.9	4.91	5.92	5.82	6.86	10.4	6.61
Sum fatty acids	g/100g DM	16.8689	20.7743	18.553	4.16102	4.84056	3.91919	4.92109	5.30071	4.48744

## Sheet: Lipid classes
Prosjekt:	3572	CODE
J. number NIFES	2013-712
Organism/date/size fraction	Sum Lipids	LPC	SM	PC	PS	PI	CL	PE	DAG	CHOL	FFA	TAG	Sum unidentified	Sum PL	Sum NL	Sum Lip
	mg lipid/g prøve	%	%	%	%	%	%	%	%	%	%	%		%	%	%
artemia 06.06.13	9.7	0	0	13.5	1.5	2.9	2.1	10	2	9.9	3	55.1	0	30	70	100
rotatorier 01.05.13	19.2	0	0	8.1	0.9	4.3	0.5	7.9	4.4	6.5	7.8	58.7	1	22.6	77.4	100
rotatorier 15.05.13	23.5	0	0	8.7	1.2	5.4	1	8.8	4.4	6.8	8.2	54.5	1	26.1	73.9	100
plankt.13.4 80-150	10.1	1.8	7.3	13.6	6.2	3.1	3.2	8.3	5.3	17.2	29	2.7	2.4	45.8	54.2	100
plankt.13.4 150-180	13.5	1.9	7	17.6	6.8	3.4	3.6	11.6	3.8	15.4	24.3	2.9	1.9	53.7	46.3	100
plankt.26.4 80-150	12.7	1.7	9.1	12.4	7.8	7.6	3.8	12.8	3.4	19.4	19	2.9	0	55.3	44.7	100
plankt.26.4 180-250	14.6	1.2	8	11.4	5.7	7.9	4.7	12.1	3.1	18	25	2.9	0	51	49	100
plankt.9.5 80-150	14.9	1.6	3.3	16.4	4.3	4.9	3.3	13.2	3.3	17	16.4	15.3	1.3	48.1	51.9	100
plankt.9.5 180-250	16.4	2.4	8.6	21.1	6.6	2.6	4.7	13.7	0	17	21.1	2.1	0	59.8	40.3	100
LysoPC	LPC
Sphingomyelin	SM
Phosphatidylcholine	PC
Phosphatidylserine	PS
Phosphatidylinositol	PI
Cardiolipin	CL
Phosphatidylethanolamine	PE
Diacylglycerol	DAG
Cholesterol	CHOL
Free fatty acid	FFA
Triacylglycerol	TAG
Cholesteryl ester	CE
